1 **The key lethal effect existed in the antibacterial behavior of short, medium, and**  
2 **long chain fatty acid monoglycerides on *Escherichia coli***

3

4 Song Zhang<sup>a</sup>, Jian Xiong<sup>a</sup>, Wenyong Lou<sup>a</sup>, Zhengxiang Ning<sup>a</sup>, Denghui Zhang<sup>b</sup> and Jiguo  
5 Yang<sup>a, b,\*</sup>

6 <sup>a</sup>School of Food Science and Engineering, South China University of Technology,  
7 381Wushan Road, Guangzhou 510641, China

8 <sup>b</sup>Innovation Center of Bioactive Molecule Development and Application, South China  
9 Institute of Collaborative Innovation, Xuefu Road, Dongguan 221116, China

10

11 Running title: Key lethal effect in monoglyceride bacteriostat

12

13 \*Corresponding author

14 Address: School of Food Science and Technology, South China University of Technology,  
15 381 Wushan Road, Guangzhou, Guangdong, China.

16 Tel: (+86)20-87113848.

17 E-mail: yangjg@scut.edu.cn.

18

19

20

21

22 **Abstract:** Monoglyceride is an amphiphilic molecule with promising antimicrobial  
23 activity for bacteria; however, the key lethal effect in its antibacterial behavior was still  
24 unknown. In the study, monobutyrate (MB), monolaurate (ML), monomyristate (MM)  
25 were selected to represent the short, medium, and long chain monoglycerides to compare  
26 their inhibitory effect against *Escherichia coli*, and a new dose-dependent inhibitory  
27 mechanism was proposed by the key lethal effect. The minimal inhibitory concentration  
28 and antibacterial curve showed a huge diversity existed in biology activity of MB, ML  
29 and MM. The results in scanning electron microscopy and flow cytometry assay  
30 indicated that the interference level of MB on cell membrane was obviously weaker than  
31 that of ML and MM, while the latter two had similar performance in increasing cell  
32 permeability at low doses. The results presented in UV-Vis spectroscopy, cell cycle and  
33 biomacromolecules synthesis inhibition assay showed that the cell cycle of *Escherichia*  
34 *coli* was obviously affected by three monoglycerides at doses near MIC, which was  
35 therefore regarded as the key lethal effect. The reason for the better biological activity of  
36 MM than ML was the stronger interference ability on bacterial cell cycle. In addition, an  
37 expanded antibacterial mode was raised that cell permeability increase at low doses was  
38 antimicrobial basis, cell cycle arrest at medium doses played the key lethal effect, and  
39 cell lysis at high doses was the result of combined action.

40

41 **Keywords:** different chain length; monoglyceride; *Escherichia coli*; key lethal effect;  
42 DNA interference; cell cycle arrest

## 43 **1. Introduction**

44 *Escherichia coli* O157:H7 (*E. coli* O157:H7), a common foodborne pathogenic  
45 bacterium, causes a series of infectious diseases in human body such as hemorrhagic  
46 diarrhea and enteritis, hemolytic uremic syndrome and thrombotic thrombocytopenic  
47 purpura (1-3). This bacteria has a strong pathogenicity and can cause obvious symptom  
48 at a very low infection dose which is lower than 50—100 cells (4). It was firstly  
49 discovered and isolated from the feces of food poisoning patients consuming  
50 contaminated hamburger in America, and subsequently appeared some large-scale  
51 outbreak cases in Japan, Canada, Australia, and some Nordic countries (4-8). The most  
52 serious disease outbreak occurred in Japan, and the infected population was up to tens of  
53 thousands of people, causing 11 of death (9). According to the report from The Centers  
54 for Disease Control, *E. coli* O157:H7 infection caused 20000 disease cases and  
55 200—500 death each year with estimated annually medical expenses of 405 million  
56 dollars in the United States (10, 11). This toxin-producing pathogenic *E. coli* has become  
57 the second common intestinal pathogen following Salmonella, and *E. coli* O157:H7  
58 infection accounted for 91.4% in pathogenic *E. coli* diseases (12).

59 Microbial contamination has become a major source of safety risks in food industry,  
60 and various physical treatments and chemical additives have been used to eliminate  
61 potential pathogens (13, 14). Owing to the concern about safeness of chemicals,  
62 consumers prefer natural preservatives or bactericides isolated from some animal and  
63 plant materials instead of synthetic chemicals (15). Fatty acid monoglycerides are a class

64 of promising antibacterial agents, naturally occurred in American pusa, animal milk and  
65 some other foods (16, 17). The esters have broad antibacterial activity toward  
66 gram-negative, gram-positive bacteria and fungi including yeasts and moulds, and  
67 inhibition effects are little affected by pH (18). In addition, monoglycerides can be  
68 resolved in the gastrointestinal tract and do not show any toxicity to human body (19). In  
69 the past decade, the studies on antibacterial activity of monoglycerides have been limited  
70 to some medium carbon chain glycerides ranged from 8 to 12 carbons (20-23). Recently,  
71 some literatures reported that the antimicrobial activity of long carbon chain fatty acid  
72 monoglycerides, including monomyrisate and monopalmitate (24, 25). Clelia Altieri  
73 revealed that the inhibition indexes of monomyrisate and monopalmitate were obviously  
74 higher than that of monolaurin on *E. coli* O157:H7 at 20 ppm after 10 h of incubation,  
75 and the inhibitory effectiveness was in dose-dependent for monolaurin, but the two else  
76 were exactly the opposite (26). However, the systematic studies on the antibacterial effect  
77 of short, medium and long carbon chain fatty acids monoglycerides are still lacking,  
78 more comparative studies are therefore necessary if selecting suitable monoglycerides for  
79 the inhibition of different microorganisms.

80 The action mechanisms in most monoglycerides antimicrobial studies focused on  
81 membrane damage, which could increase cell permeability and even lead to the leakage  
82 of cellular contents (17, 21, 27). Hyldgaard, M. visualized membrane disruption caused  
83 by monocaprylate using atomic force microscopy, indicating that cell membrane was a  
84 important action site in antibacterial test (28). Although it is known that monoglyceride

85 play the inhibitory effect by membrane damage, the complete antimicrobial mechanism  
86 is still not fully understood. Interestingly, the cell wall of the bacteria with incomplete  
87 cell membrane gradually split in the late stage of antibacterial test, suggesting that the  
88 cell wall lysis was obviously later than the membrane disruption, which was more like an  
89 antibacterial result than a action mode (29). Recently, scientists also found some cationic  
90 antibacterial peptides not only formed holes on membranes, but also bound to DNA and  
91 interfered normal cell metabolism, indicating that intracellular action was a  
92 non-negligible process after antimicrobial agents penetrating through cell membrane  
93 (30-32). Therefore, the potential intracellular action goals, especially for DNA, should be  
94 incorporated into research scope in antibacterial test in the future.

95 In present study, the inhibitory effect of short chain (2—6 carbons), medium chain (8  
96 —12 carbons), and long chain (14—18 carbons) fatty acid monoglycerides on *E. coli*  
97 *O157:H7* were compared by minimal inhibitory concentration (MIC) and antibacterial  
98 curves. The effects of monoglycerides with different chain lengths on cell surface and  
99 membrane permeability were evaluated by scanning electron microscopy (SEM) and  
100 flow cytometry. In addition, the interaction between monoglyceride and genomic DNA  
101 were studied by UV-visible spectrum and cell cycle. Moreover, intracellular DNA, RNA  
102 and protein detection was employed to explain the possible relation between DNA  
103 double helix disruption and cell division inhibition. This study was aimed at seeking the  
104 key lethal effect in monoglyceride antibacterial test and to explain the reason for the  
105 difference in the antibacterial effect of short, medium, and long chain monoglycerides.

## 106 **2. Materials and methods**

### 107 2.1 Materials

108 Monoacetate (MA), monobutyrate (MB), monocaprylate (MC), monolaurate (ML),  
109 monomyristate (MM) and Monopalmitate (MP) were obtained from Molbase Chemical  
110 Co. (Shanghai, China) with purity $\geq$ 99.0%. A series of stock solutions of the six  
111 monoglycerides were made in ethanol to obtain the concentrations of 0.01, 0.02, 0.04,  
112 0.08, 0.16, 0.32, 0.64, 1.25, 2.5, 5, and 10 mg/mL, respectively. Propidium iodide (PI,  
113 purity $\geq$ 94.0% in HPLC) was purchased from Sigma-Aldrich Co. (Santa Clara, USA). A  
114 PI stock solution was prepared to achieve the concentration of 10 mg/mL in phosphate  
115 buffer solution (PBS, 0.1 M, pH 7.5, Sigma-Aldrich Co., Santa Clara, USA) and stored at  
116 2-8°C. Hoechst 33342 (HO, purity $\geq$ 98%) and fluorescein isothiocyanate (FITC,  
117 purity $\geq$ 90%) were purchased from Yuanye Biological Technology Co. (Shanghai, China),  
118 while Pyronin Y (PY, high purity biological stain) was obtained from Acros Co.  
119 (Belgium). Their stock solutions were prepared in PBS to harvest 500  $\mu$ g/mL of HO, 2  
120 mg/mL of PY, and 100  $\mu$ g/mL of FITC. An ezup column bacteria genomic DNA  
121 purification kit was bought from Sangon Biotech Co. (Shanghai, China). Tris-HCl buffer  
122 (0.05 M, pH 7.4) was obtained from Yuanye Biological Technology Co. (Shanghai,  
123 China). The water used in the study was purified by Milli-Q device (Merck Millipore Co.,  
124 Massachusetts, USA). Glutaraldehyde solution (25% in H<sub>2</sub>O) and osmium tetroxide  
125 (purity $\geq$ 98%) were bought from Sigma-Aldrich Co. (Santa Clara, USA). 2.5% (v/v)  
126 glutaraldehyde work solution and 2% (w/v) osmium tetroxide work solution were

127 prepared in PBS for later use.

## 128 2.2 Experimental strain

129 A gram-negative bacterium, *E. coli* O157:H7 was purchased from Guangdong Culture  
130 Collection Center (Guangzhou, China). The strain powder was activated by dissolving  
131 with 1ml sterile PBS and then transferred to tryptone soy agar (TSA, Shuoheng  
132 Biotechnology Co., Guangzhou, China) solid plate to culture for 24 h or longer at 37°C.  
133 Subsequently, a single colony on solid medium was hooked onto the TSA slope medium  
134 with multiple scribing operations and cultured for 24—48 h before storing at 2—8°C.

## 135 2.3 Antibacterial activity assays

136 The antibacterial effects of short, medium and long carbon chain fatty acid  
137 monoglycerides on *E. coli* were characterized by detecting MIC and inhibition curves (33,  
138 34). The refrigerated strain was cultured in 100 mL tryptic soy broth (TSB, Shuoheng  
139 Biotechnology Co., Guangzhou, China) medium with 120 rpm shaking in 37°C until  
140 mid-logarithmic growth phase and centrifugated at 3000 rpm for 5 min. The cell pellets  
141 were firstly washed with PBS and then resuspended into diluent with cell concentration  
142 of approximate  $10^5$  CFU/mL in TSB, which was corresponding to optical density of 0.3  
143 at 600 nm ( $OD_{600} \approx 0.3$ ). 20  $\mu$ L of different concentrations of MA, MB, MC, ML, MM  
144 and MP stock solutions were blended with 180  $\mu$ L of *E. coli* diluent to achieve final  
145 concentrations of 1, 2, 4, 8, 16, 32, 64, 125, 250, 500, and 1000  $\mu$ g/mL in 96 well plates.  
146 The controls were adding the same volume of ethanol, and each concentration was  
147 repeatedly performed three times. The plates were cultured at 37°C for 24 h with 120 rpm

148 shaking. The OD<sub>600</sub> values were recorded at 0 h and 24 h by a microplate reader  
149 (SpectraMax i3x, Molecular Devices Co., San Jose, USA). The MIC was defined as the  
150 lowest concentration in which the OD<sub>600</sub> increase was smaller than 0.05 during 24 h.

151 The inhibition curves reflected the vitality of bacterial cells in monoglyceride  
152 treatment and were measured by plate counting method. According to the results of MIC  
153 assay, MB, ML and MM were selected for representing short, medium and long chain  
154 fatty acid monoglycerides to complete the research. 50 µL of MB, ML, and MM  
155 solutions were mixed with 950 µL of *E. coli* diluent in sterile 1 mL centrifuge tubes to  
156 reach final concentrations of 8, 16, 32, 64, 125, 250, 500, and 1000 µg/mL, respectively.  
157 The controls were adding 50 µL of ethanol and all samples were conducted in triplicate.  
158 The cells were cultivated for 1 h at 37°C with 120 rpm shaking. Then 10-fold serially  
159 dilutions were performed for all *E. coli* samples and cultivating for 24 h at 37°C prior to  
160 colony counting.

## 161 2.4 Membrane integrity test

### 162 2.4.1 SEM assay

163 According to the reports of previous literatures (35, 36), the influence of MB, ML and  
164 MM on the *E. coli* surface was assessed by SEM. 50 µL of three monoglycerides  
165 solutions were mixed with 950 µL of cell diluent prepared as the above method in sterile  
166 centrifuge tubes to obtain final concentrations of 1/2 MIC, 1 MIC, and 2 MIC,  
167 respectively. The controls were adding the same volume of ethanol. The cell samples  
168 were cultured for 1 h at 37°C with orbital shaking at 120 rpm and collected by



169 centrifugation at 3000 rpm for 5 min. Then cell pellets were washed twice with sterile  
170 PBS and fixed with 0.5 mL of 2.5% (v/v) glutaraldehyde work solution for 12 h at 4°C.  
171 On the second day, the *E. coli* cells were post fixed in 0.1 mL of 2% (w/v) osmium  
172 tetroxide work solution at room temperature for 2 h. Subsequently, the immobilized cells  
173 were washed with sterile PBS and orderly dehydrated with 30%, 50%, 60%, 70%, 80%,  
174 90%, and 100% ethanol solution for 10 min. Then a drop of cell solution in ethanol was  
175 added onto the coverslip to stand until the cells had settled down. After freeze-drying in  
176 vacuum for 24h or longer, a cold field scanning electron microscopy (UHR FE-SEM  
177 SU8220, Hitachi Ltd., Tokyo, Japan) was allowed to record the change of membrane  
178 morphology.

#### 179 2.4.2 Cell permeability measurement

180 The changes of *E. coli* membrane permeabilities after adding MB, ML and MM were  
181 investigated by the method of Hyldgaard, M. et al. with some modification (37). The *E.*  
182 *coli* cells were harvested in mid-log growth phase by centrifugation and wash, and  
183 resuspended to cell density of  $10^5$  CFU/mL with sterile TSB. 950  $\mu$ L of aliquot cell  
184 diluents were combined with 50  $\mu$ L of three monoglycerides solutions to obtain final  
185 concentrations of 0, 2, 4, 8, 16, 32, 64, 125, 250, and 500  $\mu$ g/mL. Each concentration was  
186 performed three times in parallel. All groups were cultured at 37°C for 1 h except of  
187 85°C heating for 1 h in positive controls, which provided maximum detection boundary  
188 (MDB). Subsequently, the cells were washed with sterile PBS and resuspended in 1 mL  
189 PBS before staining with 50  $\mu$ L of 100  $\mu$ g/mL PI work solution for 20 min in dark

190 condition. Finally, the cell samples were immediately allowed to fluorescence analysis by  
191 a flow cytometer (CytoFLEX, Beckman Coulter Co., California, USA). The excitation  
192 and emission wavelength of PI were located at 488 nm and 610 nm, respectively (38).  
193 The sample flow rate was controlled as 100—500 cells/s, and at least 10000 cells were  
194 collected for the following data analysis.

## 195 2.5 Interaction of monoglycerides with different chain lengths and genomic DNA

### 196 2.5.1 Impact of different monoglycerides on the structure of genomic DNA

197 To examine the impact for DNA brought by monoglycerides, UV-visible spectroscopy  
198 was carried out similar to the method described by Hegde, A. H. et al (39). The genomic  
199 DNA was purified from viable *E. coli* cells in mid-log growth phase by an ezup column  
200 bacteria genomic DNA purification kit. The ratio of the UV absorbance of genomic DNA  
201 at 260 nm and 280 nm was 1.85, suggesting that the purified DNA was free from proteins  
202 (40). The concentration of *E. coli* DNA was diluted to 3.6 mM in sterile Tris-HCl buffer,  
203 calculating by UV absorbance at 260 nm in 1 cm quartz cell divided by  $6600 \text{ M}^{-1} \text{ cm}^{-1}$  of  
204 a molar absorption coefficient (32). Subsequently, 25  $\mu\text{L}$  of MB, ML and MM solution  
205 were mixed with 475  $\mu\text{L}$  of *E. coli* diluents with cell density of  $10^5 \text{ CFU/mL}$  to obtain  
206 final monoglycerides concentrations of 2, 4, 8, 16, 32, 64, 125, 250, 500, and 1000  
207  $\mu\text{g/mL}$  in sterile 1.5 mL centrifuge tubes. The control groups were adding the same  
208 volume of ethanol and all samples were allowed to equilibrate for 5 min before UV  
209 spectral scanning. To eliminate the adverse effect from background, the baseline was  
210 firstly corrected for Tris-HCl buffer signal. The UV spectral was recorded at a

211 wavelength range from 220 nm to 320 nm and obtained the average of three  
212 determinations in parallel.

### 213 2.5.2 Effect of different monoglycerides on the cell division of *E. coli*

214 Cell cycle is an important indicator of cell division function and is measured by flow  
215 cytometry combined with PI staining according to the report from Steen, H. B. et al (41).  
216 50  $\mu$ L of MB, ML and MM solutions were combined with 950  $\mu$ L of *E. coli* suspensions  
217 ( $10^5$  CFU/ml) to achieve final monoglyceride concentrations of 1/4 MIC, 1/2 MIC, 1  
218 MIC, 2 MIC, and 4 MIC, respectively. The controls were added 50  $\mu$ L of ethanol and all  
219 groups were repeatedly performed three times. The treated cells were cultured at 37°C for 1  
220 h with 120 rpm shaking before centrifuge collection and PBS wash. The cell pellets were  
221 fixed with 70% (v/v) ice ethanol (pre-cooling at -20°C overnight) for 12 h or longer at  
222 4°C. Subsequently, the cells were centrifuged and washed to remove the stationary liquid.  
223 Finally, 1 mL of 50  $\mu$ g/mL PI work solution (containing 1 mg/mL Rnase) was added into  
224 the immobilized cells to stain for 20 min at 4°C in the dark condition before detecting by  
225 the Beckman flow cytometer. The excitation and emission wavelength of PI-DNA  
226 complex were located at 488 nm and 610 nm, respectively. The flow rate of cell solution  
227 was turned to 100—200 cells/s, and at least 30000 cells were captured for the subsequent  
228 scatter and histogram analysis.

### 229 2.5.3 Influence of different monoglycerides on the synthesis of intracellular 230 biomacromolecules

231 The synthesis inhibition of MB, ML and MM on DNA, RNA and protein in *E. coli* was

232 studied by flow cytometry combined with three fluorescence staining (42). Three dyes,  
233 HO, PY and FITC, were used to stain intracellular DNA, RNA and protein, respectively.  
234 Their relative contents were characterized by measuring light intensity of blue, red and  
235 green fluorescence which almost had no overlap in the emission spectrum region. The  
236 viable *E. coli* cells were harvested from overnight cultures by centrifugation and  
237 resuspended to cell density of  $10^5$  CFU/mL in broth. 950  $\mu$ L aliquots of cell suspensions  
238 were supplemented with 50  $\mu$ L of MB, ML and MM solution to reach final concentration  
239 of 1 MIC. The controls contained 50  $\mu$ L of ethanol instead of monoglycerides solutions.  
240 The solutions were incubated for 0, 10, 20, 30, 40, 50, and 60 min at 37°C, respectively.  
241 After different time periods, the *E. coli* cells were collected by centrifugation.  
242 Subsequently, 1 mL of 70% (v/v) ice ethanol (pre-cooled at -20°C for 12h) was added to  
243 fix overnight at 4°C. The stationary liquid was removed by centrifugation prior to PBS  
244 wash. Finally, 1 mL of mixed dyes solution containing 0.5  $\mu$ g/mL HO, 2.0  $\mu$ g/mL PY,  
245 and 0.1  $\mu$ g/mL FITC in PBS was added to stain for 20 min at 4°C in the dark condition  
246 before allowing to the analysis of flow cytometry.

247 The semi-automatic device was equipped with three laser excitation flow system.  
248 Specifically, the excitation laser wavelengths of DNA, RNA and protein fluorescence  
249 were located at 355 nm, 530 nm, and 457 nm respectively. Correspondingly, the emission  
250 fluorescence of HO-DNA (blue), PY-RNA (red), and FITC-protein (green) were  
251 measured at 450 nm, 580 nm, and 520 nm, respectively. The fluorescence signal was  
252 repeatedly captured three times for each cell sample before drawing frequency distribution

253 histograms and calculating phase proportions.

## 254 2.6 Statistical analysis

255 The averages of colony count of three repetitions were converted into cell density (log  
256 CFU/mL). All data in figure were showed as average  $\pm$  standard deviation (SD) of three  
257 replicate measurements. The variance analysis of results was performed by One-Way  
258 ANOVA in OriginPro 8.5. A tukey test was used to confirm the significant variance in  
259 statistics between controls and samples when  $p < 0.05$ .

## 260 3. Results

### 261 3.1 Antibacterial effects of monoglycerides with different chain lengths

262 The antimicrobial activity of short, medium, and long chain monoglycerides was  
263 qualitatively compared by MIC and quantitatively characterized by antibacterial curve.  
264 The MIC of MB, ML, and MM against *E. coli* were 500  $\mu\text{g/mL}$ , 64  $\mu\text{g/mL}$ , and 32  
265  $\mu\text{g/mL}$ , suggesting that ML and MM are more active than MB in terms of inhibitory  
266 concentration. Subsequently, the population of *E. coli* cells after three monoglycerides  
267 treatment was shown in Figure 1. The cell counts all decreased in a  
268 concentration-dependent manner with the larger decline in ML and MM groups. Besides,  
269 the cell population declined more than 2 log units when adding MB, ML, and MM at  
270 respective MIC, which exceeded the action effect of three monoglycerides at  
271 corresponding half maximal inhibitory concentrations. Furthermore, 500  $\mu\text{g/mL}$  of ML  
272 and 250  $\mu\text{g/mL}$  of MM played totally bactericidal activity against *E. coli*, which could  
273 not achieve for MB even if its concentration increased to 1000  $\mu\text{g/mL}$ , suggesting that

274 evident variance was existed in the sensitivity of *E. coli* to monoglycerides with different  
275 chain lengths.

## 276 3.2 Membrane integrity assay

### 277 3.2.1 SEM observation

278 As shown in Figure 2A, the untreated *E. coli* cells had a flat, smooth surface. However,  
279 after adding MB, ML, and MM, the cell membrane became uneven, rough, and even  
280 concave. Specifically, the *E. coli* cells did not change into rough until MB concentration  
281 increased to 2 MIC (Figure 2B-D). After ML treatment, the cell membrane lose smooth  
282 and flat surface at 1/2 MIC, and increasing concentration further to 1 MIC and 2 MIC,  
283 the cell surface showed further distortion with deeper depression and larger deformation.  
284 As for MM treatment at 1/2 MIC, 1 MIC, and 2 MIC, the cells surface sequentially  
285 appeared flat, rough, and obvious depression.

### 286 3.2.2 Membrane permeability measurement

287 The fluorescence signal of PI in *E. coli* cells was often regarded as an indicator of  
288 membrane destruction because it was captured after penetrating through damaged cell  
289 surface and binding to intracellular DNA (43). The permeability ratios of membranes of  
290 *E. coli* exposed to various concentrations of MB, ML, and MM were calculated by  
291 dividing the cell population with significant fluorescence signal by the total cell number,  
292 and the statistical results were shown in Figure 3. Compared to 25.81±1.50% of  
293 permeability ratio of *E. coli* cells in control group, the percent of cell with damaged  
294 membrane after three monoglycerides treatment all increased with an increase in

295 concentration, but all did not exceed the MDB of  $93.59 \pm 3.37\%$ . Specifically, the  
296 monoglycerides concentrations causing above 50% of penetration ratio were 250  $\mu\text{g/mL}$   
297 for MB, 8  $\mu\text{g/mL}$  for ML, and 8  $\mu\text{g/mL}$  for MM, suggesting that the penetration capacity  
298 of MB to the cell membrane of *E. coli* was much lower than that of ML and MM which  
299 did not show obvious difference in penetration ability. Surprisingly, increasing further  
300 ML and MM concentration to 4 MIC led a decrease in membrane permeability, which  
301 might be due to the fact that a large part of cell death and membrane lysis appeared in  
302 membrane-damaged *E. coli* at high concentration, resulting in the appearance of the  
303 decrease trend in Figure 3 (44).

### 304 3.3 Action of monoglycerides with different chain lengths on *E. coli* DNA

#### 305 3.3.1 Effect of different monoglycerides on DNA structure of *E. coli*

306 The result of UV-visible spectral from the interaction between genomic DNA of *E. coli*  
307 and monoglycerides was shown in Figure 4. Before adding monoglyceride, the  
308 absorbance peak of *E. coli* DNA appeared at the wavelength of 260 nm. After adding  
309 three monoglycerides, the maximum absorbance values increased to varying degrees  
310 without obvious shift in wavelength, which was called hyperchromic effect, indicating  
311 that the double helix of *E. coli* DNA was destroyed by the foreign monoglycerides.  
312 Furthermore, examination the spectrum difference in MB, ML, and MM group revealed  
313 that the maximum absorbance value in MM group (0.544 at 250 nm) was greater than  
314 that in ML group (0.499 at 250 nm) and MB group (0.52 at 251 nm), suggesting that the  
315 destruction level of DNA duplexes by MM was greater than that by MB and ML. In

316 addition, the monoglyceride concentrations causing the maximum absorption peaks in  
317 UV spectra were in great discrepancy with 16 ppm for MB, 8 ppm for ML, and 4 ppm for  
318 MM.

### 319 3.3.2 Cell cycle changes

320 As shown in Figure 5, the flow histogram in control group showed a DNA distribution  
321 of a large peak close to a small peak. After adding MB, ML and MM, the two peaks in  
322 treated groups both became higher and narrower, indicating that monoglyceride treatment  
323 might alter DNA distribution in the cell cycle of *E. coli*. Furthermore, the cell proportion  
324 in G1, S, and G2 phases after the treatment of three monoglycerides was recorded in  
325 Figure 6. The G1 percents in three treated groups were all increased with different  
326 degrees, and only a significant effect was observed at 2 MIC for MB, 1 MIC for ML, and  
327 1/2 MIC for MM. Surprisingly, further increasing MM concentration to 4 MIC resulted  
328 in a decrease in G1 proportion, which may be attributed to the leakage of DNA in  
329 damaged cells, which could be observed in Figure 2I. Comparison the discrepancy of *E.*  
330 *coli* cell cycle among MB, ML, and MM treatment showed the most remarkable growth  
331 appeared at MM group, followed by ML group, and MB group grew the slowest,  
332 indicating that a great discrepancy occurred at the interference action of monoglycerides  
333 with different chain lengths on the cell cycle of *E. coli*.

### 334 3.3.3 Biomacromolecule synthesis inhibition

335 Apart from studying the effect of monoglycerides on structure and function of *E. coli*  
336 DNA, the synthesis inhibition of DNA, RNA and protein was shown in Figure 7.



337 Compared to the steadily growth of DNA, RNA and protein content in control group, the  
338 content of the three biomacromolecules in experimental groups showed a totally different  
339 growth trend. Specifically, the RNA amount declined immediately without any time  
340 delay once adding monoglyceride, different from a surprisingly phenomenon of  
341 increasing firstly and then decreasing in DNA and protein content measurement,  
342 suggesting that RNA synthesis was firstly affected after adding monoglycerides, and then  
343 the DNA and protein synthesis was inhibited after 30min or completing a generation of  
344 cell division. Compared to timely interference in RNA synthesis, the hysteresis in the  
345 suppression of DNA and protein synthesis also implied that DNA transcription or RNA  
346 synthesis, rather than the synthesis process of protein and DNA, was the first action  
347 target in genetic central dogma. Examination the growth difference among MB, ML, and  
348 MM treatment revealed that the synthesis inhibition of ML and MM on three  
349 biomacromolecules was obviously greater than that of MB in the same conditions.

#### 350 **4. Discussion**

##### 351 4.1 The sensitivity of *E. coli* to the monoglycerides with different chain lengths

352 In general, fatty acid monoglycerides have broad antibacterial spectrum and stable  
353 inhibitory activity, which are often used to control foodborne pathogens according to  
354 some previous reports (17, 20, 21, 27, 45, 46). They offer a preliminary view on  
355 antimicrobial performance of individual monoglyceride in medium or food ingredients.  
356 Moreover, our study found that fatty acid chain length markedly affected the antibacterial  
357 performance of monoglycerides on *E. coli*, among which the sensitivity to ML and MM

358 exceeded 8 times of that to MB. The comparative investigation in antibacterial effect of  
359 medium carbon chain monoglycerides against *E. coli* has been conducted to select the  
360 most active lipid. Clelia Altieri found *E. coli O157:H7* was completely inhibited in PC  
361 broth plus 50 µg/mL of monolaurate, whereas monomyristate and monopalmitate at the  
362 same concentration did not have the effect, which could be explained by different  
363 medium compositions and various culture conditions (26).

364 In this assay, the treatment with ML at 500 µg/mL or MM at 250 µg/mL killed *E. coli*  
365 cells to undetectable level, whereas MB bactericidal ability was limited even at the  
366 maximum concentration (only resulting in more than 2.2 log reduction in cell population).  
367 The huge difference in antibacterial activity among short and medium-long chain  
368 monoglycerides may be attributed to the weaker hydrophobic interaction between acyl  
369 carbon chain and the lipid membrane (47, 48). On the other hand, the hydrophobic of  
370 monoglyceride increased with increasing the length of carbon chain, which reduced its  
371 solubility in aqueous solution, thus preventing its transport through *E. coli* cell  
372 membrane (49).

#### 373 4.2 Membrane action mechanism

374 At present, many studies on action mechanism of monoglyceride on bacterial cell  
375 membrane involve the change in physical morphology and the decrease in the ability to  
376 control material enter and exclude cell membrane (28, 50, 51). SEM images revealed that  
377 three monoglycerides exposure produced an uneven, rough and wrinkled surface as well  
378 as the appearance of depression on the affected *E. coli* cells, which was similar to the

379 phenomenon reported in some literatures (21, 27, 50, 52, 53). Monoglycerides are a class  
380 of non-ionic surfactants with acyl carbon chains and hydroxyl groups, which could  
381 interact with the hydrophobic region and disrupt the composition of *E. coli* membrane  
382 (29, 54). In addition, the interaction of monoglyceride into cell membrane also increases  
383 the fluidity and permeability of the membrane (55, 56). This explanation is further  
384 supported by the growth trend of membrane permeability of monoglyceride-treated *E.*  
385 *coli* in Figure 3.

386 Review of the relationship among MIC, membrane morphology changing and cell  
387 permeability increasing revealed that the bacterial cell membrane was not the only site  
388 where monoglycerides work. As shown in Figure 2, the monoglyceride concentrations  
389 when depression and breakage appeared on *E. coli* surface were above 2 MIC (1000  
390  $\mu\text{g/mL}$ ) for MB, 1 MIC (64  $\mu\text{g/mL}$ ) for ML, and 2 MIC (64  $\mu\text{g/mL}$ ) for MM, all  
391 exceeding their respective MIC, which was more like the final result of many  
392 antibacterial effects. Furthermore, the results in Figure 3 indicated that the MB, ML, and  
393 MM concentrations causing more than 50% of permeability ratio were 250  $\mu\text{g/mL}$ , 8  
394  $\mu\text{g/mL}$ , and 8  $\mu\text{g/mL}$ , respectively. However, compared to control groups, the three  
395 monoglycerides at the above concentrations did not cause significant decrease in cell  
396 population in experimental groups, suggesting that the increase in membrane  
397 permeability of *E. coli* had little correlation with the loss of cell viability. On the whole,  
398 the above observations showed that monoglyceride increased cell permeability at low  
399 concentrations and cause cell damage or even cell lysis at high concentrations, however,

400 they were both not the key lethal action in the antibacterial test of monoglycerides  
401 against *E. coli*.

402 The reason for the difference in sensitivity to short, medium, and long chain  
403 monoglycerides may be discrepancy in action for membrane integrity. The MB  
404 concentration causing *E. coli* breakage was above 1000 µg/mL, which was far more than  
405 that of ML and MM. Similarly, the MB concentration causing above 50% of penetration  
406 ratio was 250 µg/mL, which was also much higher than that of ML and MM. The poor  
407 action effect of MB on cell membrane might be a suitable explanation for the  
408 unsatisfactory antibacterial performance in MB treatment, but was still insufficient to  
409 clarify the causes for antibacterial difference between ML and MM treatment if only in  
410 terms of the increase level in cell permeability. Considering the finding of the potential  
411 intracellular action targets in the antibacterial test of peptides (57-59), more in-depth  
412 studies are encouraged to make clear the causes for antibacterial difference of ML and  
413 MM on *E. coli*.

#### 414 4.3 Interference of monoglyceride on the structure and function of *E. coli* DNA

415 There are many potential intracellular action objects after monoglyceride penetrating  
416 through cell membrane, and genomic DNA is one of the goals that cannot be ignored.  
417 According to the reports in some literatures, the modes in which foreign compounds  
418 interact with DNA are summarized as three types: intercalation binding between  
419 molecular and stacked base pairs in DNA, groove binding between molecular and major  
420 or minor grooves in DNA double-helix, and electrostatic binding between charged

421 molecule and the external DNA backbone (60, 61). UV-visible spectral is a useful tool to  
422 study the interaction between *E. coli* DNA and foreign antibacterial agents (62). As we  
423 known, the hypochromic effect combined with a red shift in wavelength is observed only  
424 when the axial change of DNA conformation occurs, causing by the foreign molecular  
425 intercalating into DNA (63). In general, the growth magnitude in absorption spectrum is  
426 closely related to its binding force, which means the stronger its binding force, the more  
427 evident DNA hypochromic effect (64). However, Figure 4 showed a hyperchromic effect  
428 without obvious wavelength shift in UV-visible spectra, which was different from the  
429 above law of axial change, suggesting that the interaction mode between monoglyceride  
430 and *E. coli* DNA was not the typical intercalation binding. In addition, monoglyceride is  
431 an amphiphilic molecule without any charged groups, which excludes the possibility of  
432 electrostatic binding. Therefore, it is speculated that groove binding is a suitable and  
433 acceptable action mode.

434 The adverse impact of monoglyceride on DNA double helix may affect the DNA  
435 function and cell division, and the cell cycle is an important index for assessing whether  
436 cell division is normal or not (65). It is known that bacteria are prokaryotic cells that  
437 have phases I, R, and D in the cell cycle, corresponding to phases G1, S, and M in  
438 eukaryotic cells (66). Unlike eukaryotic cells, bacteria will directly enter into the phase D  
439 to begin chromosome separation immediately without going through phase G2. Flow  
440 cytometry is a common method to investigate the effect of foreign substances on the cell  
441 cycle. Figure 5 showed that peak shape in flow histogram of *E. coli* was obviously

442 affected by MB, ML, and MM. Specifically, the growth in phase G1, and the decline in  
443 phases S and G2 in Figure 6 indicated that monoglyceride firstly disturbed phase G1  
444 instead of phases S and G2, causing *E. coli* cells to arrest in phase G1 and therefore were  
445 unable to complete normal cell division. The finding does not fully correspond to some  
446 previous reports of antibacterial agents (67, 68). PAN Ling Zi also found that phase G1  
447 of cell cycle was evidently affected in *GS115* after melittin treatment for 4h (66).  
448 Whereas, Jin Cai revealed that the *Laminaria japonica* extract acted on phase R (or phase  
449 S) rather than phase I (or phase G1), causing cell cycle of *C. michiganense* arrest in  
450 phase R (69).

451 In order to further study the correlation between DNA double helix disruption and  
452 abnormal cell cycle, the synthesis of intracellular DNA, RNA, and protein was evaluated  
453 using flow cytometry. The results presented in Figure 7 indicated that DNA, RNA, and  
454 protein synthesis are affected after adding monoglyceride, and the time of DNA and  
455 protein synthesis receiving inhibition are much later than that of RNA. Similar studies  
456 have been conducted to figure out the effect of antimicrobial peptides on bacterial  
457 macromolecular synthesis (70-72). Aleksander Patrzykat found that the RNA synthesis in  
458 *E. coli* CGSC 4908 was affected after adding pleurocidin peptide at MIC within 5 min,  
459 followed by the suppression for DNA synthesis, whereas protein synthesis was not  
460 obviously affected except for a decrease in growth rate (73). Evan F. Haney also  
461 observed a similar growth trend of DNA, RNA, and protein synthesis in *E. coli* CGSC  
462 4908 with three Puro B peptides treatment for 30 min (67). The difference between the

463 assay and previous reports is due to differences in antibacterial agent types, binding  
464 modes with DNA and action time (72, 74, 75). Combination with the action site of  
465 monoglyceride on the cell cycle of *E. coli*, it is speculated that DNA double helix is  
466 firstly damaged, followed by the inhibition of RNA synthesis, subsequently protein and  
467 DNA synthesis is also affected, resulting in DNA replication suppression and cell cycle  
468 arrest in phase G1.

469 A new concentration-dependent antibacterial mechanism is summarized in Figure 8.  
470 The monoglyceride firstly crosses *E. coli* membrane at concentrations far below the MIC,  
471 which is the basis for the antibacterial effect. Then it targets to genomic DNA and  
472 damages its double helix, affecting RNA synthesis and subsequent protein and DNA  
473 synthesis, causing cell cycle arrest, and finally resulting in cell division disorder. The  
474 interference of cell cycle often means the inhibition of cell division which occurred at  
475 concentrations close to MIC; therefore, we consider this type of intracellular action as the  
476 key lethal effect in the antibacterial test of monoglycerides on *E. coli*. And the membrane  
477 lysis and cell disruption appear when adding monoglycerides at 2 MIC or more, which is  
478 more like the final result of a combination of various antimicrobial modes.

479 The differentiated performance of ML and MM treatment in UV-visible spectra and  
480 cell cycle assay may be used for explaining the causes for different sensitivity of *E. coli*  
481 to two monoglycerides. The saturation action concentration of ML in hyperchromic  
482 effect was 8  $\mu\text{g/mL}$ , which was higher than 4  $\mu\text{g/mL}$  of that in MM treatment.  
483 Furthermore, a significant growth in phase G1 after adding ML was observed at 64

484  $\mu\text{g/mL}$ , much larger than 4  $\mu\text{g/mL}$  of concentration observed in MM treatment. These  
485 data revealed that the saturated action concentration of MM to DNA double helix and cell  
486 cycle in *E. coli* was obviously smaller than that of ML, indicating that the inhibitory  
487 effect of MM to *E. coli* DNA was greater than that of ML at doses near MIC. As for the  
488 reason for the different affinity between two esters and *E. coli* DNA, we are still not clear,  
489 which may need to be further studied by the interaction force including hydrogen bond,  
490 van der Waal's force, and hydrophobic interaction (76, 77).

491 In conclusion, the study presented here explained the cause for the divergence in the  
492 antibacterial activity of short, medium and long chain monoglycerides on *E. coli*, and  
493 identified DNA interference and cell cycle arrest as the key lethal effect in the  
494 antibacterial behavior of monoglyceride, and proposed a new dose-dependent inhibitory  
495 mechanism. In three monoglycerides, MB has the worst antibacterial effect due to its  
496 poorest membrane permeability, and the superiority of MM in comparison with ML is  
497 mainly due to its stronger DNA destroying ability and higher interference effect on cell  
498 cycle, which also means better inhibition ability on cell division. As for the inhibitory  
499 modes, the increase of membrane permeability at low doses is the basis for playing the  
500 antibacterial effect, then the arrest of cell cycle at doses near MIC is the key lethal effect  
501 in antibacterial test, and the final cell lysis at high doses is considered as the result of  
502 synergistic action of various antibacterial effects. In addition, a possible route was  
503 proposed to explain the correlation between DNA double helix disruption and cell cycle  
504 arrest.



505 **Acknowledgments**

506 Mr. Hao Cheng and Mr. Tao Ruan are acknowledged for their assistance in operating  
507 flow cytometer and scanning electron microscope. Dr Yaping Nie is greatly appreciated  
508 for her useful suggestion in the aspect of cell cycle.

509 **Funding**

510 This work was supported by the National Key Technology R&D Program of China  
511 (No. 2017YFC1601000).

512 **Conflict of interest**

513 The authors declare no competing financial interest.

514

515

516

517

518

519

520

521

522

523

524

525

526 **References**

- 527 1. Rangel JM, Sparling PH, Crowe C, Griffin PM, Swerdlow DL. 2005.  
528 Epidemiology of Escherichia coli O157 : H7 outbreaks, United States, 1982-2002.  
529 Emerging Infectious Diseases 11:603-609.
- 530 2. Lee GY, Jang HI, Hwang IG, Rhee MS. 2009. Prevalence and classification of  
531 pathogenic Escherichia coli isolated from fresh beef, poultry, and pork in Korea.  
532 International Journal of Food Microbiology 134:196-200.
- 533 3. Scholl D, Cooley M, Williams SR, Gebhart D, Martin D, Bates A, Mandrell R.  
534 2009. An Engineered R-Type Pyocin Is a Highly Specific and Sensitive  
535 Bactericidal Agent for the Food-Borne Pathogen Escherichia coli O157:H7.  
536 Antimicrobial Agents and Chemotherapy 53:3074-3080.
- 537 4. Kaper JB, Nataro JP, Mobley HLT. 2004. Pathogenic Escherichia coli. Nature  
538 Reviews Microbiology 2:123-140.
- 539 5. Doyle MP, Schoeni JL. 1987. Isolation of Escherichia coli O157:H7 from retail  
540 fresh meats and poultry. Applied and environmental microbiology 53:2394-6.
- 541 6. Mead PS, Griffin PM. 1998. Escherichia coli O157 : H7. Lancet 352:1207-1212.
- 542 7. Tsuboi I, Ida H, Yoshikawa E, Hiyoshi S, Yamaji E, Nakayama I, Nonomiya T,  
543 Shigenobu F, Shimizu M, O'Hara K, Sawai T, Mizuoka K. 1998. Antibiotic  
544 susceptibility of enterohemorrhagic Escherichia coli O157 : H7 isolated from an  
545 outbreak in Japan in 1996. Antimicrobial Agents and Chemotherapy 42:431-432.
- 546 8. Rhee MS, Lee SY, Dougherty RH, Kang DH. 2003. Antimicrobial effects of

- 547 mustard flour and acetic acid against *Escherichia coli* O157 : H7, *Listeria*  
548 *monocytogenes*, and *Salmonella enterica* serovar typhimurium. *Applied and*  
549 *Environmental Microbiology* 69:2959-2963.
- 550 9. Kim SA, Rhee MS. 2015. Predictive model and optimization of a combined  
551 treatment of caprylic acid and citric acid for the reduction of *Escherichia coli*  
552 O157:H7 using the response surface methodology. *International Journal of Food*  
553 *Microbiology* 197:9-14.
- 554 10. Scallan E, Hoekstra RM, Angulo FJ, Tauxe RV, Widdowson MA, Roy SL, Jones  
555 JL, Griffin PM. 2011. Foodborne Illness Acquired in the United States-Major  
556 Pathogens. *Emerging Infectious Diseases* 17:7-15.
- 557 11. Frenzen PD, Drake A, Angulo FJ, Program EI. 2005. Economic cost of illness  
558 due to *Escherichia coli* O157 infections in the United States. *Journal of Food*  
559 *Protection* 68:2623-2630.
- 560 12. Gould LH, Mungai EA, Johnson SD, Richardson LC, Williams IT, Griffin PM,  
561 Cole DJ, Hall AJ. 2013. Surveillance for Foodborne Disease Outbreaks - United  
562 States, 2009-2010. *Mmwr-Morbidity and Mortality Weekly Report* 62.
- 563 13. Bae YY, Lee HJ, Kim SA, Rhee MS. 2009. Inactivation of *Alicyclobacillus*  
564 *acidoterrestris* spores in apple juice by supercritical carbon dioxide. *International*  
565 *Journal of Food Microbiology* 136:95-100.
- 566 14. Kim SA, Kim OY, Rhee MS. 2010. Direct application of supercritical carbon  
567 dioxide for the reduction of *Cronobacter* spp. (*Enterobacter sakazakii*) in end

- 568 products of dehydrated powdered infant formula. *Journal of Dairy Science*  
569 93:1854-1860.
- 570 15. Kim SA, Lee MK, Park TH, Rhee MS. 2013. A combined intervention using  
571 fermented ethanol and supercritical carbon dioxide to control *Bacillus cereus* and  
572 *Bacillus subtilis* in rice. *Food Control* 32:93-98.
- 573 16. Takeuchi H, Noguchi O, Sekine S, Kobayashi A, Aoyama T. 2006. Lower weight  
574 gain and higher expression and blood levels of adiponectin in rats fed  
575 medium-chain TAG compared with long-chain TAG. *Lipids* 41:207-212.
- 576 17. Luo CY, Zeng ZL, Gong DM, Zhao CY, Liang QF, Zeng C. 2014. Evaluation of  
577 monolaurin from camphor tree seeds for controlling food spoilage fungi. *Food*  
578 *Control* 46:488-494.
- 579 18. Schlievert PM, Peterson ML. 2012. Glycerol Monolaurate Antibacterial Activity  
580 in Broth and Biofilm Cultures. *Plos One* 7.
- 581 19. Zhang H, Xu YQ, Wu LJ, Zheng XD, Zhu SM, Feng FQ, Shen LR. 2010.  
582 Anti-yeast activity of a food-grade dilution-stable microemulsion. *Applied*  
583 *Microbiology and Biotechnology* 87:1101-1108.
- 584 20. Bunkova L, Bunka F, Janis R, Krejci J, Dolezalkova I, Pospisil Z, Ruzicka J,  
585 Tremlova B. 2011. Comparison of antibacterial effect of seven 1-monoglycerides  
586 on food-borne pathogens or spoilage bacteria. *Acta Veterinaria Brno* 80:29-39.
- 587 21. Marounek M, Putthana V, Benada O, Lukesova D. 2012. Antimicrobial Activities  
588 of Medium-chain Fatty Acids and Monoacylglycerols on *Cronobacter sakazakii*

- 589 DBM 3157(T) and *Cronobacter malonaticus* DBM 3148. *Czech Journal of Food*  
590 *Sciences* 30:573-580.
- 591 22. Sevcikova P, Kasparkova V, Hauerlandova I, Humpolicek P, Kucekova Z,  
592 Bunkova L. 2014. Formulation, antibacterial activity, and cytotoxicity of  
593 1-monoacylglycerol microemulsions. *European Journal of Lipid Science and*  
594 *Technology* 116:448-457.
- 595 23. Bunkova L, Krejci J, Janis R, Kasparkova V, Vltavska P, Kulendova L, Bunka F.  
596 2010. Influence of monoacylglycerols on growth inhibition of micromycetes in  
597 vitro and on bread. *European Journal of Lipid Science and Technology*  
598 112:173-179.
- 599 24. Altieri C, Bevilacqua A, Cardillo D, Sinigaglia M. 2009. Antifungal activity of  
600 fatty acids and their monoglycerides against *Fusarium* spp. in a laboratory  
601 medium. *International Journal of Food Science and Technology* 44:242-245.
- 602 25. Altieri C, Cardillo D, Bevilacqua A, Sinigaglia M. 2007. Inhibition of *Aspergillus*  
603 spp. and *Penicillium* spp. by fatty acids and their monoglycerides. *Journal of*  
604 *Food Protection* 70:1206-1212.
- 605 26. Altieri C, Bevilacqua A, Cardillo D, Sinigaglia M. 2009. Effectiveness of fatty  
606 acids and their monoglycerides against gram-negative pathogens. *International*  
607 *Journal of Food Science and Technology* 44:359-366.
- 608 27. Kim SA, Rhee MS. 2013. Marked Synergistic Bactericidal Effects and Mode of  
609 Action of Medium-Chain Fatty Acids in Combination with Organic Acids against

- 610 *Escherichia coli* O157:H7. *Applied and Environmental Microbiology*  
611 79:6552-6560.
- 612 28. Hyldgaard M, Sutherland DS, Sundh M, Mygind T, Meyer RL. 2012.  
613 Antimicrobial Mechanism of Monocaprylate. *Applied and Environmental*  
614 *Microbiology* 78:2957-2965.
- 615 29. Bergsson G, Arnfinnsson J, Steingrímsson O, Thormar H. 2001. Killing of  
616 Gram-positive cocci by fatty acids and monoglycerides. *Apmis* 109:670-678.
- 617 30. Hsu CH, Chen CP, Jou ML, Lee AYL, Lin YC, Yu YP, Huang WT, Wu SH. 2005.  
618 Structural and DNA-binding studies on the bovine antimicrobial peptide,  
619 indolicidin: evidence for multiple conformations involved in binding to  
620 membranes and DNA. *Nucleic Acids Research* 33:4053-4064.
- 621 31. Lan Y, Ye Y, Kozłowska J, Lam JKW, Drake AF, Mason AJ. 2010. Structural  
622 contributions to the intracellular targeting strategies of antimicrobial peptides.  
623 *Biochimica Et Biophysica Acta-Biomembranes* 1798:1934-1943.
- 624 32. Liu X, Li X, Zhang Z, Dong Y, Liu P, Zhang C. 2013. Studies on Antibacterial  
625 Mechanisms of Copper Complexes with 1,10-phenanthroline and Amino Acid on  
626 *Escherichia coli*. *Biological Trace Element Research* 154:150-155.
- 627 33. Branen JK, Davidson PM. 2004. Enhancement of nisin, lysozyme, and  
628 monolaurin antimicrobial activities by ethylenediaminetetraacetic acid and  
629 lactoferrin. *International Journal of Food Microbiology* 90:63-74.
- 630 34. Jang HI, Rhee MS. 2009. Inhibitory effect of caprylic acid and mild heat on

- 631 Cronobacter spp. (*Enterobacter sakazakii*) in reconstituted infant formula and  
632 determination of injury by flow cytometry. *International Journal of Food*  
633 *Microbiology* 133:113-120.
- 634 35. Jung SW, Thamphiwatana S, Zhang LF, Obonyo M. 2015. Mechanism of  
635 Antibacterial Activity of Liposomal Linolenic Acid against *Helicobacter pylori*.  
636 *Plos One* 10.
- 637 36. Obonyo M, Zhang L, Thamphiwatana S, Pornpattananangkul D, Fu V, Zhang LF.  
638 2012. Antibacterial Activities of Liposomal Linolenic Acids against  
639 Antibiotic-Resistant *Helicobacter pylori*. *Molecular Pharmaceutics* 9:2677-2685.
- 640 37. Hyldgaard M, Mygind T, Piotrowska R, Foss M, Meyer RL. 2015. Isoeugenol has  
641 a non-disruptive detergent-like mechanism of action. *Frontiers in Microbiology* 6.
- 642 38. Cuestas ML, Sosnik A, Mathet VL. 2011. Poloxamines Display a Multiple  
643 Inhibitory Activity of ATP-Binding Cassette (ABC) Transporters in Cancer Cell  
644 Lines. *Molecular Pharmaceutics* 8:1152-1164.
- 645 39. Hegde AH, Prashanth SN, Seetharamappa J. 2012. Interaction of antioxidant  
646 flavonoids with calf thymus DNA analyzed by spectroscopic and electrochemical  
647 methods. *Journal of Pharmaceutical and Biomedical Analysis* 63:40-46.
- 648 40. Zhang GW, Wang LH, Zhou XY, Li Y, Gong D. 2014. Binding Characteristics of  
649 Sodium Saccharin with Calf Thymus DNA in Vitro. *Journal of Agricultural and*  
650 *Food Chemistry* 62:991-1000.
- 651 41. Steen HB, Boye E. 1980. Bacterial growth studied by flow cytometry. *Cytometry*

- 652 1:32-6.
- 653 42. Crissman HA, Darzynkiewicz Z, Tobey RA, Steinkamp JA. 1985. Normal and  
654 perturbed Chinese hamster ovary cells: correlation of DNA, RNA, and protein  
655 content by flow cytometry. *The Journal of cell biology* 101:141-7.
- 656 43. Sachidanandham R, Gin KYH, Poh CL. 2005. Monitoring of active but  
657 non-culturable bacterial cells by flow cytometry. *Biotechnology and  
658 Bioengineering* 89:24-31.
- 659 44. Kim SA, Rhee MS. 2016. Highly enhanced bactericidal effects of medium chain  
660 fatty acids (caprylic, capric, and lauric acid) combined with edible plant essential  
661 oils (carvacrol, eugenol, beta-resorcylic acid, trans-cinnamaldehyde, thymol, and  
662 vanillin) against *Escherichia coli* O157:H7. *Food Control* 60:447-454.
- 663 45. Thormar H, Hilmarsson H, Bergsson G. 2006. Stable concentrated emulsions of  
664 the 1-monoglyceride of capric acid (Monocaprin) with microbicidal activities  
665 against the food-borne bacteria *Campylobacter jejuni*, *Salmonella* spp., and  
666 *Escherichia coli*. *Applied and Environmental Microbiology* 72:522-526.
- 667 46. Vltavska P, Kasparikova V, Janis R, Bunkova L. 2012. Antifungal and  
668 antibacterial effects of 1-monocaprylin on textile materials. *European Journal of  
669 Lipid Science and Technology* 114:849-856.
- 670 47. Wang LL, Johnson EA. 1992. Inhibition of *Listeria monocytogenes* by fatty acids  
671 and monoglycerides. *Applied and environmental microbiology* 58:624-9.
- 672 48. Skrivanova E, Marounek M, Dlouha G, Kanka J. 2005. Susceptibility of



- 673 Clostridium perfringens to C-2-C-18 fatty acids. Letters in Applied Microbiology  
674 41:77-81.
- 675 49. Ouattara B, Simard RE, Holley RA, Piette GJP, Begin A. 1997. Antibacterial  
676 activity of selected fatty acids and essential oils against six meat spoilage  
677 organisms. International Journal of Food Microbiology 37:155-162.
- 678 50. Bergsson G, Arnfinnsson J, Steingrímsson O, Thormar H. 2001. In vitro killing of  
679 Candida albicans by fatty acids and monoglycerides. Antimicrobial Agents and  
680 Chemotherapy 45:3209-3212.
- 681 51. Zhang H, Taxipalati M, Yu LY, Que F, Feng FQ. 2013. Structure-Activity  
682 Relationship of a U-Type Antimicrobial Microemulsion System. Plos One 8.
- 683 52. Valipe SR, Nadeau JA, Annamali T, Venkitanarayanan K, Hoagland T. 2011. In  
684 vitro antimicrobial properties of caprylic acid, monocaprylin, and sodium  
685 caprylate against Dermatophilus congolensis. American Journal of Veterinary  
686 Research 72:331-335.
- 687 53. Thakur S, Karak N. 2013. Castor oil-based hyperbranched polyurethanes as  
688 advanced surface coating materials. Progress in Organic Coatings 76:157-164.
- 689 54. Sun CQ, O'Connor CJ, Robertson AM. 2003. Antibacterial actions of fatty acids  
690 and monoglycerides against Helicobacter pylori. Fems Immunology and Medical  
691 Microbiology 36:9-17.
- 692 55. Glover RE, Smith RR, Jones MV, Jackson SK, Rowlands CC. 1999. An EPR  
693 investigation of surfactant action on bacterial membranes. Fems Microbiology

- 694 Letters 177:57-62.
- 695 56. Madler B, Binder H, Klose G. 1998. Compound complex formation in  
696 phospholipid membranes induced by a nonionic surfactant of the oligo(ethylene  
697 oxide) alkyl ether type: A comparative DSC and FTIR study. *Journal of Colloid  
698 and Interface Science* 202:124-138.
- 699 57. Hancock REW, Chapple DS. 1999. Peptide antibiotics. *Antimicrobial Agents and  
700 Chemotherapy* 43:1317-1323.
- 701 58. Manhong Wu, Elke Maier, Roland Benz A, ‡ REWH. 1999. Mechanism of  
702 Interaction of Different Classes of Cationic Antimicrobial Peptides with Planar  
703 Bilayers and with the Cytoplasmic Membrane of *Escherichia coli*†. *Biochemistry*  
704 38:7235-7242.
- 705 59. Wu MH, Hancock REW. 1999. Interaction of the cyclic antimicrobial cationic  
706 peptide bactenecin with the outer and cytoplasmic membrane. *Journal of  
707 Biological Chemistry* 274:29-35.
- 708 60. Shi Y, Guo CL, Sun YJ, Liu ZL, Xu FG, Zhang Y, Wen ZW, Li ZA. 2011.  
709 Interaction between DNA and Microcystin-LR Studied by Spectra Analysis and  
710 Atomic Force Microscopy. *Biomacromolecules* 12:797-803.
- 711 61. Geng S, Wu Q, Shi L, Cui F. 2013. Spectroscopic study one thiosemicarbazone  
712 derivative with ctDNA using ethidium bromide as a fluorescence probe.  
713 *International Journal of Biological Macromolecules* 60:288-294.
- 714 62. Qiao M, Li C, Shi Y, Liu S, Liu Z, Hu X. 2015. Study on interactions of

- 715 aminoglycoside antibiotics with calf thymus DNA and determination of calf  
716 thymus DNA via the resonance Rayleigh scattering technique. *Luminescence the*  
717 *Journal of Biological & Chemical Luminescence* 30:1159.
- 718 63. Kashanian S, Khodaei MM, Pakravan P. 2010. Spectroscopic Studies on the  
719 Interaction of Isatin with Calf Thymus DNA. *DNA and Cell Biology* 29:639-646.
- 720 64. Long XF, Miao Q, Bi SP, Li DS, Zhang CH, Zhao H. 2004. Resonance Rayleigh  
721 scattering method for the recognition and determination of double-stranded DNA  
722 using amikacin. *Talanta* 64:366-372.
- 723 65. Inácio ÂS, Domingues NS, Nunes A, Martins PT, Moreno MJ, Estronca LM,  
724 Fernandes R, Moreno AJ, Borrego MJ, Gomes JP. 2015. Quaternary ammonium  
725 surfactant structure determines selective toxicity towards bacteria: mechanisms of  
726 action and clinical implications in antibacterial prophylaxis. *Journal of*  
727 *Antimicrobial Chemotherapy* 44:103-114.
- 728 66. Pan LZ, Na J, Xing Z, Fang HJ, Wang GL. 2007. Inhibiting effect of melittin on  
729 pathogens of crops. *Chinese Science Bulletin* 52:639-644.
- 730 67. Haney EF, Petersen AP, Lau CK, Jing WG, Storey DG, Vogel HJ. 2013.  
731 Mechanism of action of puroidoline derived tryptophan-rich antimicrobial  
732 peptides. *Biochimica Et Biophysica Acta-Biomembranes* 1828:1802-1813.
- 733 68. Efthimiadou EK, Karaliota A, Psomas G. 2010. Metal complexes of the  
734 third-generation quinolone antimicrobial drug sparfloxacin: Structure and  
735 biological evaluation. *Journal of Inorganic Biochemistry* 104:455-466.

- 736 69. Cai J, Feng J, Xie S, Wang F, Xu Q. 2014. Laminaria japonica Extract, an  
737 Inhibitor of *Clavibacter michiganense* Subsp. *Sepedonicum*. *Plos One* 9:e94329.
- 738 70. Ulvatne H, Samuelsen Ø, Haukland HH, Krämer M, Vorland LH. 2004.  
739 Lactoferricin B inhibits bacterial macromolecular synthesis in *Escherichia coli*  
740 and *Bacillus subtilis*. *Fems Microbiology Letters* 237:377-384.
- 741 71. Subbalakshmi C, Sitaram N. 2010. Mechanism of antimicrobial action of  
742 indolicidin. *Fems Microbiology Letters* 160:91-96.
- 743 72. Pellegrini A, Thomas U, Wild P, Schraner E, Von FR. 2000. Effect of lysozyme or  
744 modified lysozyme fragments on DNA and RNA synthesis and membrane  
745 permeability of *Escherichia coli*. *Microbiological Research* 155:69-77.
- 746 73. Patrzykat A, Friedrich CL, Zhang LJ, Mendoza V, Hancock REW. 2002.  
747 Sublethal concentrations of pleurocidin-derived antimicrobial peptides inhibit  
748 macromolecular synthesis in *Escherichia coli*. *Antimicrobial Agents and*  
749 *Chemotherapy* 46:605-614.
- 750 74. Jr OL, I O, Rogers ME, Consolvo PJ, Condie BA, Lovas S, Bulet P,  
751 Blaszczykthurin M. 2000. Interaction between heat shock proteins and  
752 antimicrobial peptides. *Biochemistry* 39:14150-14159.
- 753 75. Chan BP, Kim HS, Sun CK. 1998. Mechanism of Action of the Antimicrobial  
754 Peptide Buforin II: Buforin II Kills Microorganisms by Penetrating the Cell  
755 Membrane and Inhibiting Cellular Functions. *Biochemical & Biophysical*  
756 *Research Communications* 244:253-257.

- 757 76. Tong C, Xiang G, Bai Y. 2010. Interaction of paraquat with calf thymus DNA: a  
758 terbium(III) luminescent probe and multispectral study. *Journal of Agricultural &*  
759 *Food Chemistry* 58:5257.
- 760 77. Zhong-Qin LI, Xiao-Ping XU, Meng C, Shi XA, Guo YH. 2004. The  
761 Determination of Polybasic Ionization Constants of Kanamycin A and B. *Journal*  
762 *of Chemical Engineering of Chinese Universities*.
- 763
- 764
- 765
- 766
- 767
- 768
- 769
- 770
- 771
- 772
- 773
- 774
- 775
- 776
- 777

778 **Figure captions**

779 Figure 1. Counts of viable *E. coli* cells after treatment with MB, ML, and MM at 8, 16,  
780 32, 64, 125, 250, 500, and 1000  $\mu\text{g}/\text{mL}$  for 1 h. Error bar was represented for standard  
781 deviations (SD) of three repeatedly determinations (n=3).

782

783 Figure 2. SEM images of *E. coli* after cultivation with short, medium, and long chain  
784 fatty acid monoglycerides at 37°C for 1 h. The control group (A) was not added any  
785 monoglycerides. The *E. coli* cells were treated with MB (B to D), ML (E to G), and MM  
786 (H to J) at 1/2 MIC (B, E, and H), 1 MIC (C, F, and I), and 2 MIC (D, G, and J),  
787 respectively.

788

789 Figure 3. The changes in permeability ratio of membrane of *E. coli* treated with MB, ML,  
790 and MM. The statistical results of the control groups (adding the same volume of ethanol  
791 and cultivating at 37°C for 1 h), the heated treat groups (adding the same volume of  
792 ethanol and cultivating at 85°C for 1 h), and the test groups (adding MB, ML, and MM at  
793 2, 4, 8, 16, 32, 64, 125, 250, and 500  $\mu\text{g}/\text{mL}$  respectively and cultivating at 37°C for 1 h)  
794 were shown above. Error bar was stood for SD (n=3).

795

796 Figure 4. UV-visible spectrum of *E. coli* genomic DNA treated with MB (A), ML (B),  
797 and MM (C) at concentrations of 2, 4, 8, 16, 32, 64, 125, 250, 500, and 1000  $\mu\text{g}/\text{mL}$ . The  
798 spectra scanning was recorded at a wavelength range from 220 nm to 320 nm, and each

799 curve was stood for the average of three repeatly determinations

800 Figure 5. Flow histograms of *E. coli* treated with MB (A0-A5), ML (B0-B5), and MM  
801 (C0-C5) at 0 (A0, B0, and C0), 1/4 MIC (A1, B1, and C1), 1/2 MIC (A2, B2, and C2), 1  
802 MIC (A3, B3, and C3), 2 MIC (A4, B4, and C4), and 4 MIC (A5, B5, and C5).

803

804 Figure 6. Ratio changes of G1, S, and G2 phase in *E. coli* cell cycle after treatment with  
805 MB, ML, and MM at 0, 1/4 MIC, 1/2 MIC, 1 MIC, 2 MIC, and 4 MIC. "\*", § and #"   
806 indicated statistical significant difference from the control group in G1, S, and G2 phase  
807 respectively. Error bar was represented for SD (n=3).

808

809 Figure 7. Changes of DNA (A), RNA (B) and protein (C) content in *E. coli* cell after  
810 treatment with MB, ML, and MM at MIC for 0, 10, 20, 30, 40, 50, and 60 min  
811 respectively. The control groups were added with the same volume of ethanol instead of  
812 monoglyceride solution. Error bar was represented for SD (n=3).

813

814 Figure 8. Explanation of the overall inhibitory mechanisms of glycerol monoglyceride on  
815 *E. coli* with monolaurate as an example. ML firstly crossed the cell membrane and  
816 interfered with the normal function of the DNA, eventually leading to cell lysis. The  
817 action site of ML on DNA was identified as the process of DNA transcription, causing  
818 the reduction in the synthesis of RNA and protein, resulting in cell cycle arrest and  
819 ultimately cell division inhibition.

820 Table of contents graphics

821 The main content of the manuscript is summarized in a figure. Glycerol monoglyceride  
822 with different chain lengths shows different biological activity against *Escherichia coli*  
823 and their antibacterial mechanism can be summarized as the following: the antibacterial  
824 basis is the increase of membrane permeability at low concentration, the key action is the  
825 inhibition of cell division in medium concentration near MIC, and the cell lysis at high  
826 concentration can be regarded as the result of combination action of multiple  
827 antibacterial effects.

828

829

830

831

832

833

834

835

836

837

838

839

840



841 Figure 1

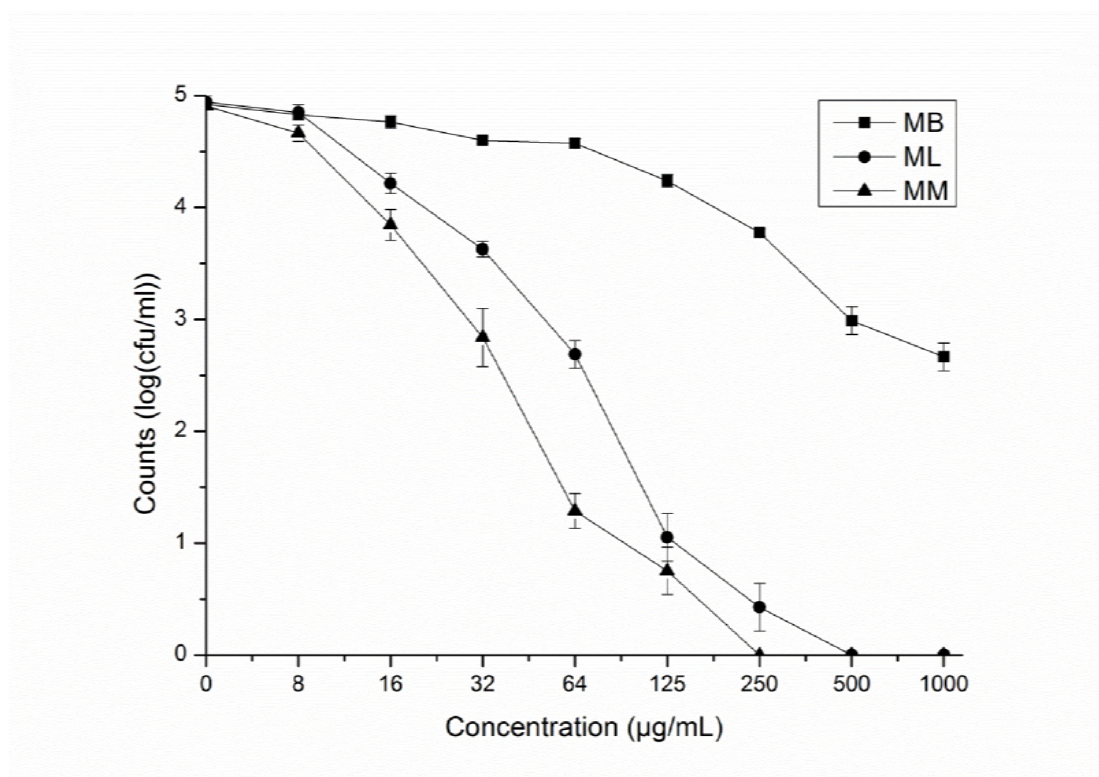

842

843

844

845

846

847

848

849

850

851

852

853 Figure 2

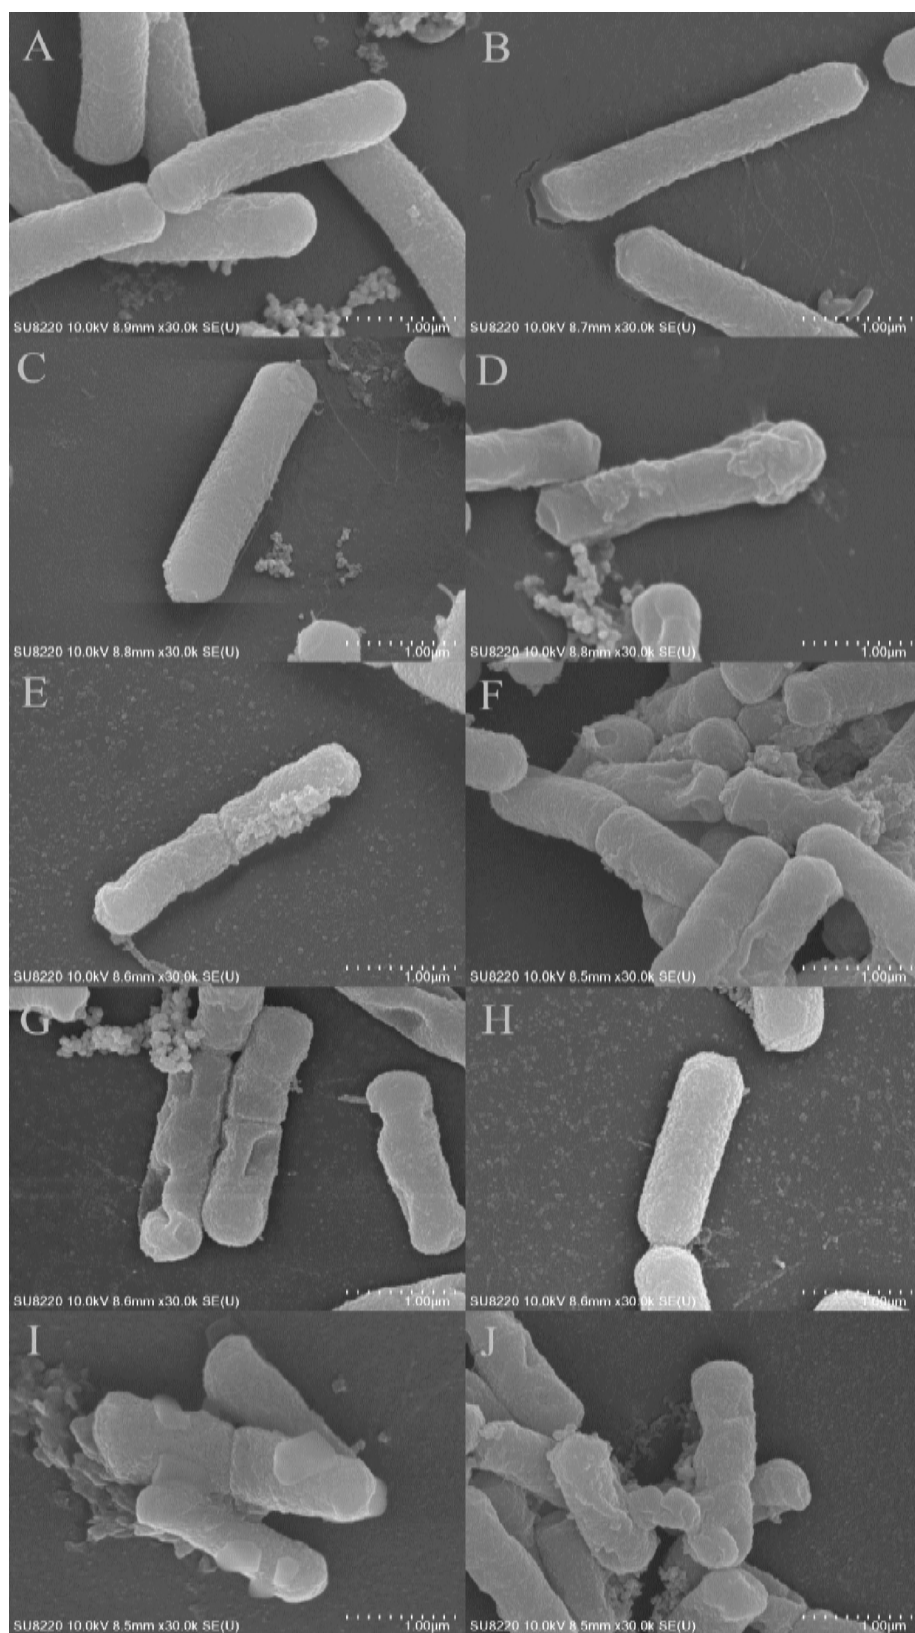

854

855 Figure 3

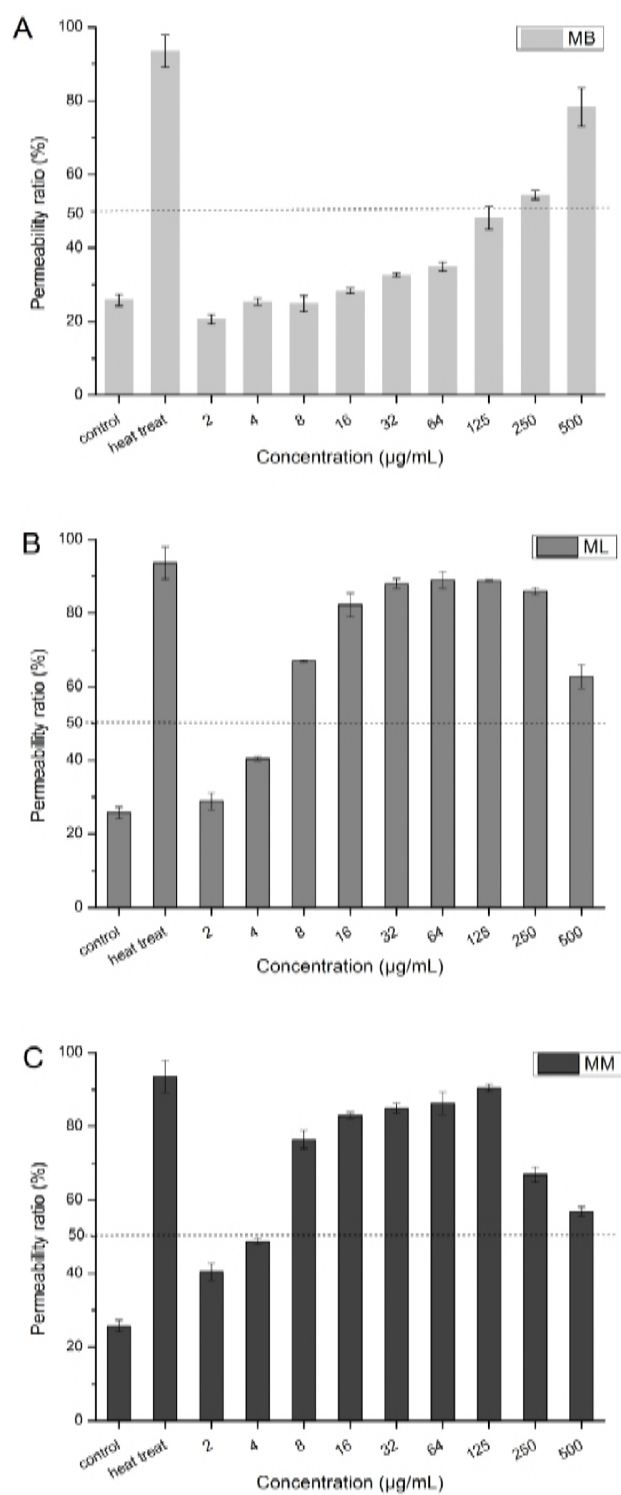

856

857

858 Figure 4

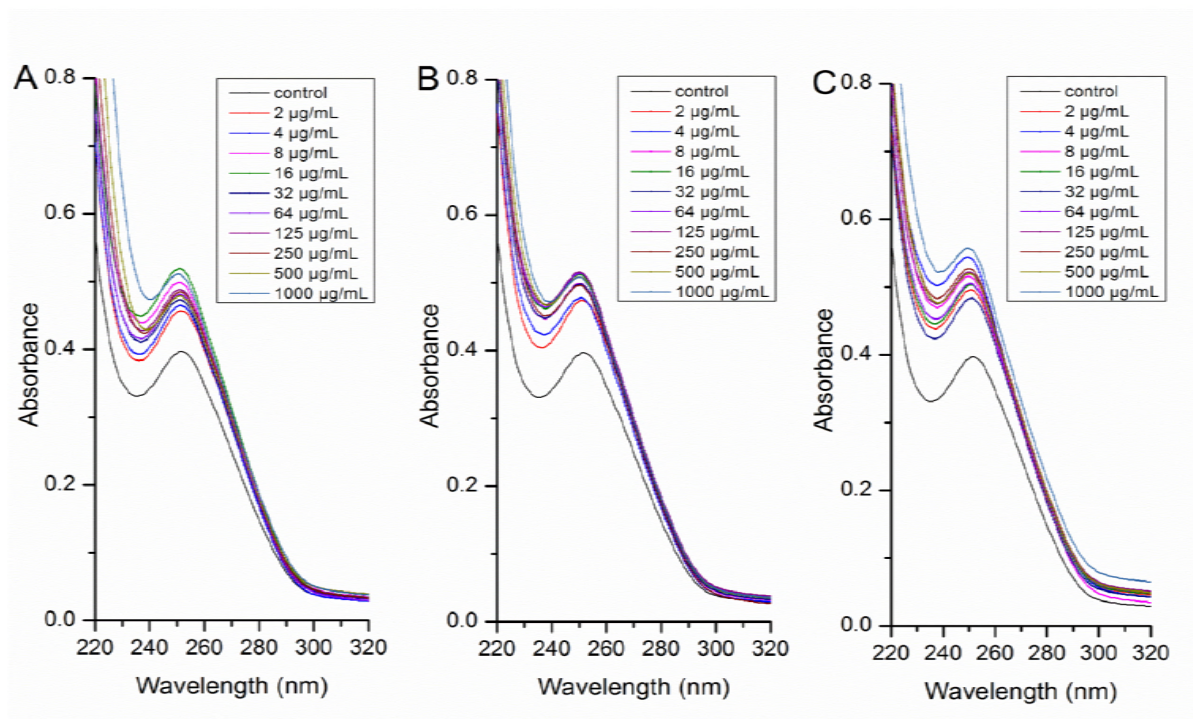

859

860



861 Figure 5

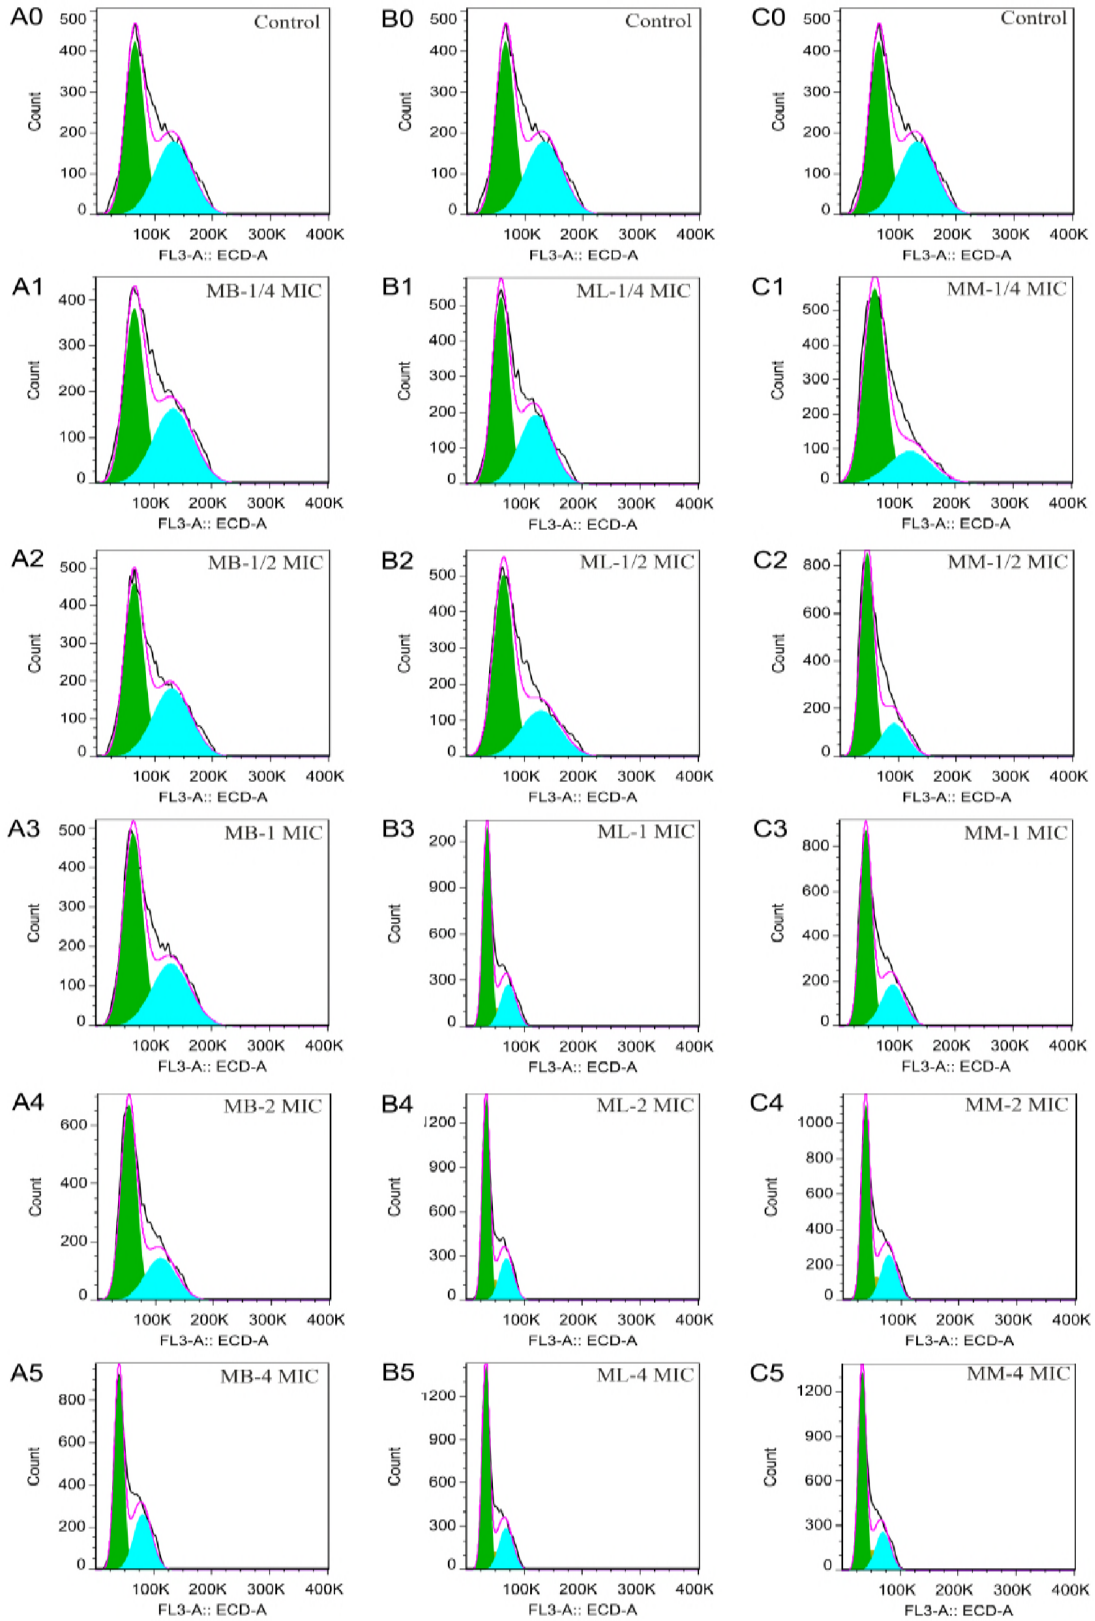

862

863

864 Figure 6

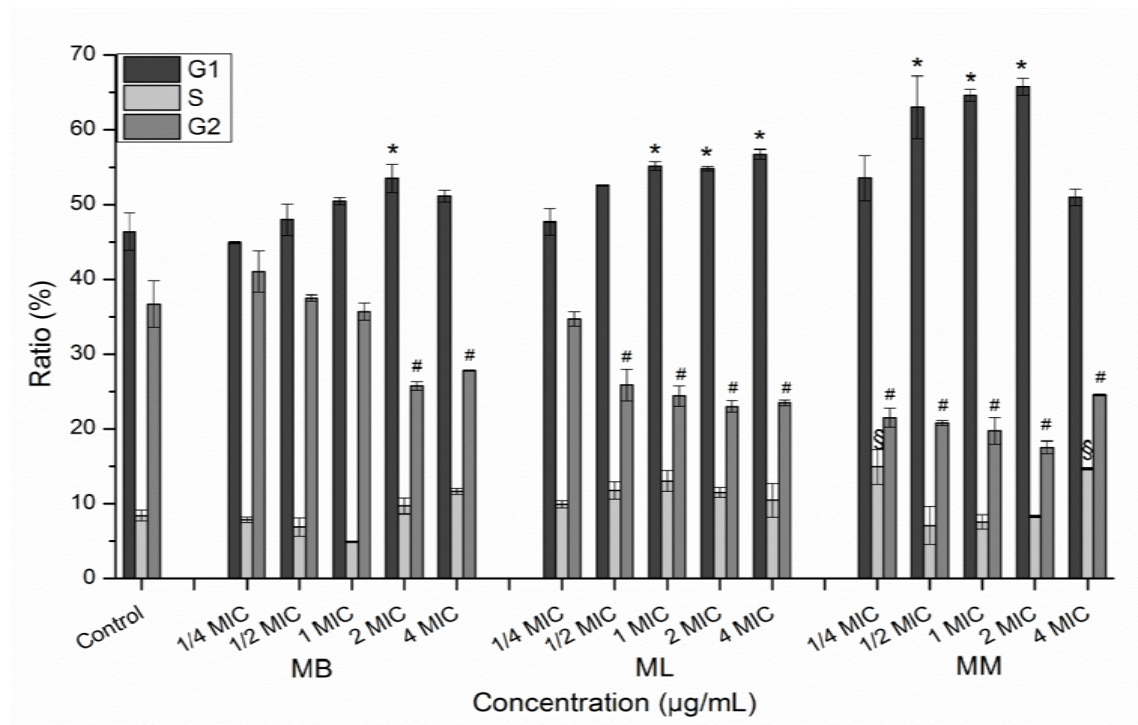

865

866

867

868

869

870

871

872

873

874

875

876

877 Figure 7

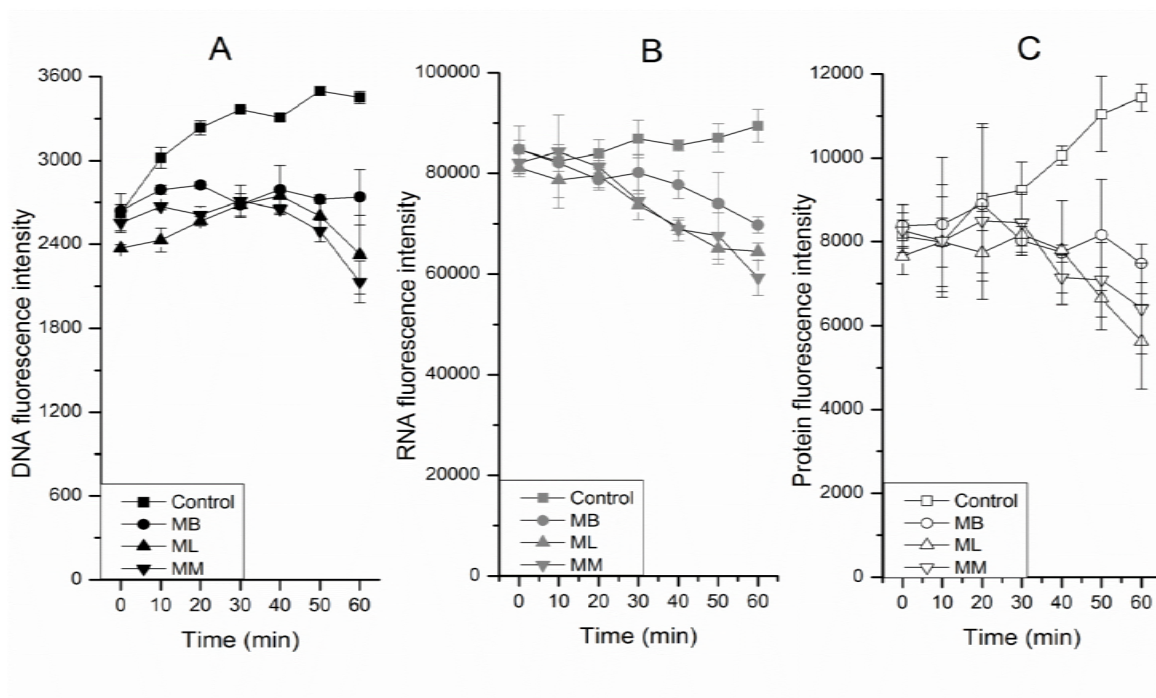

878

879 Figure 8

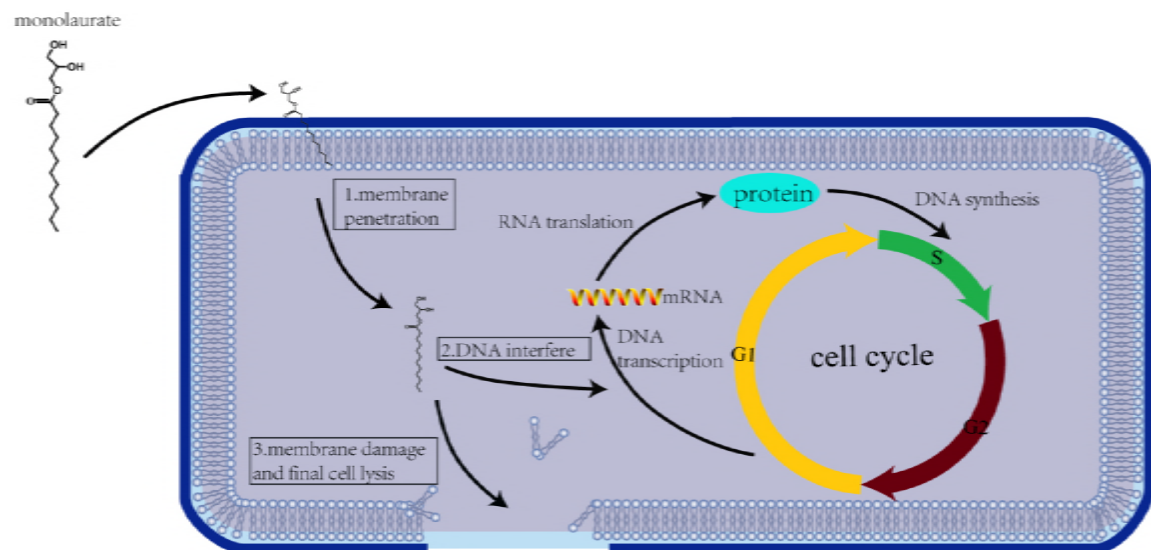

880

881

882

883

884

885

886

887

888

889

890

891

892

893



894 Table of contents

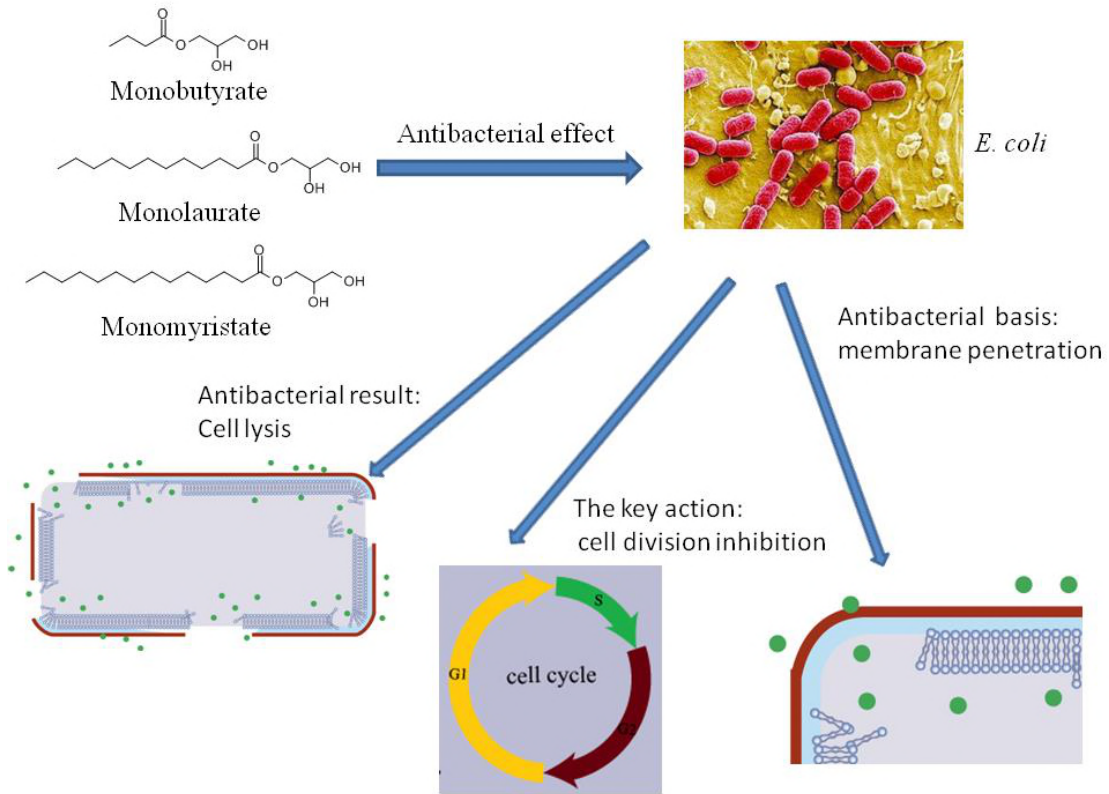

895

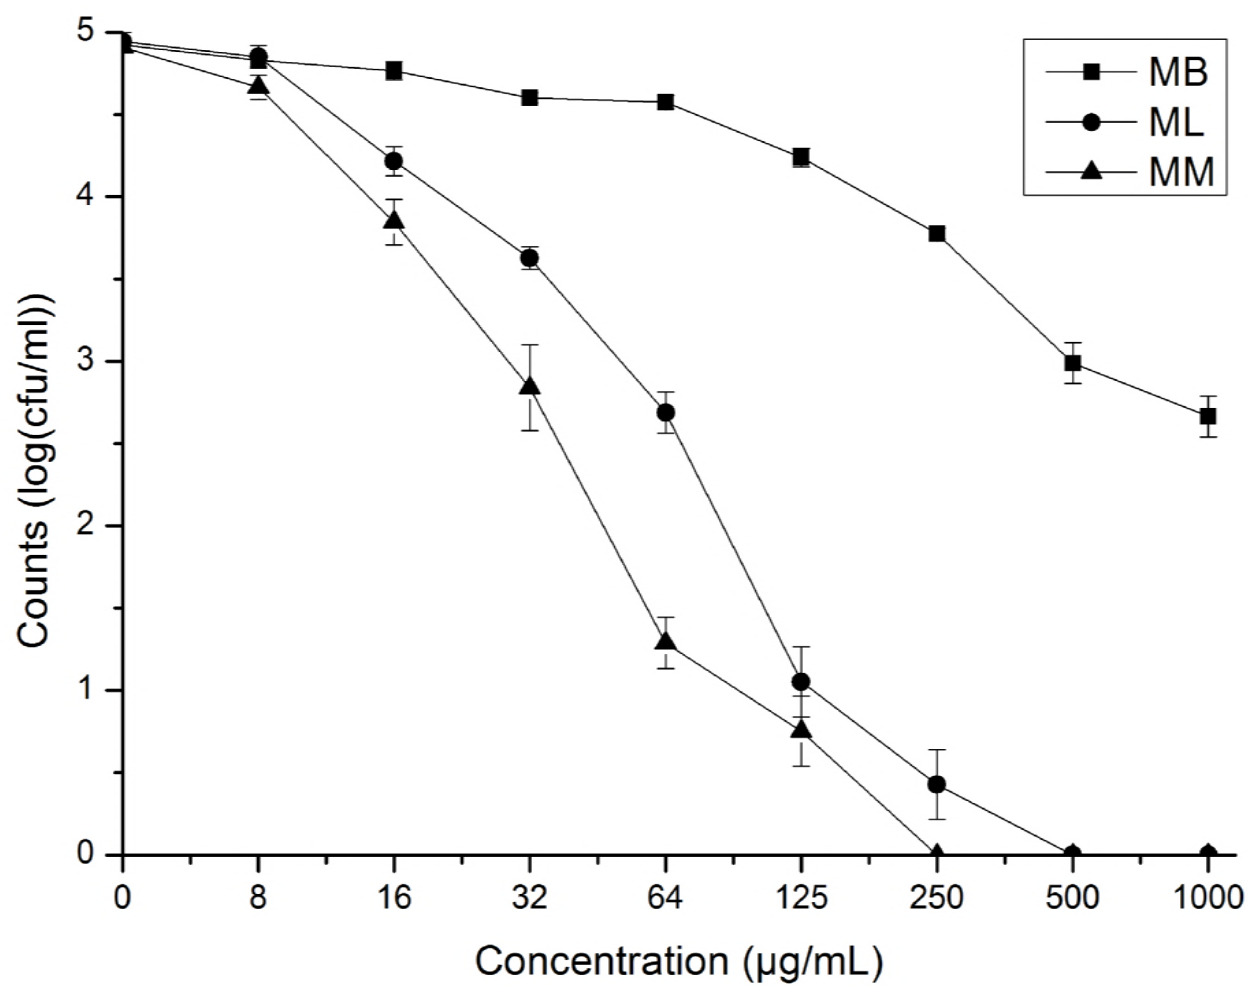

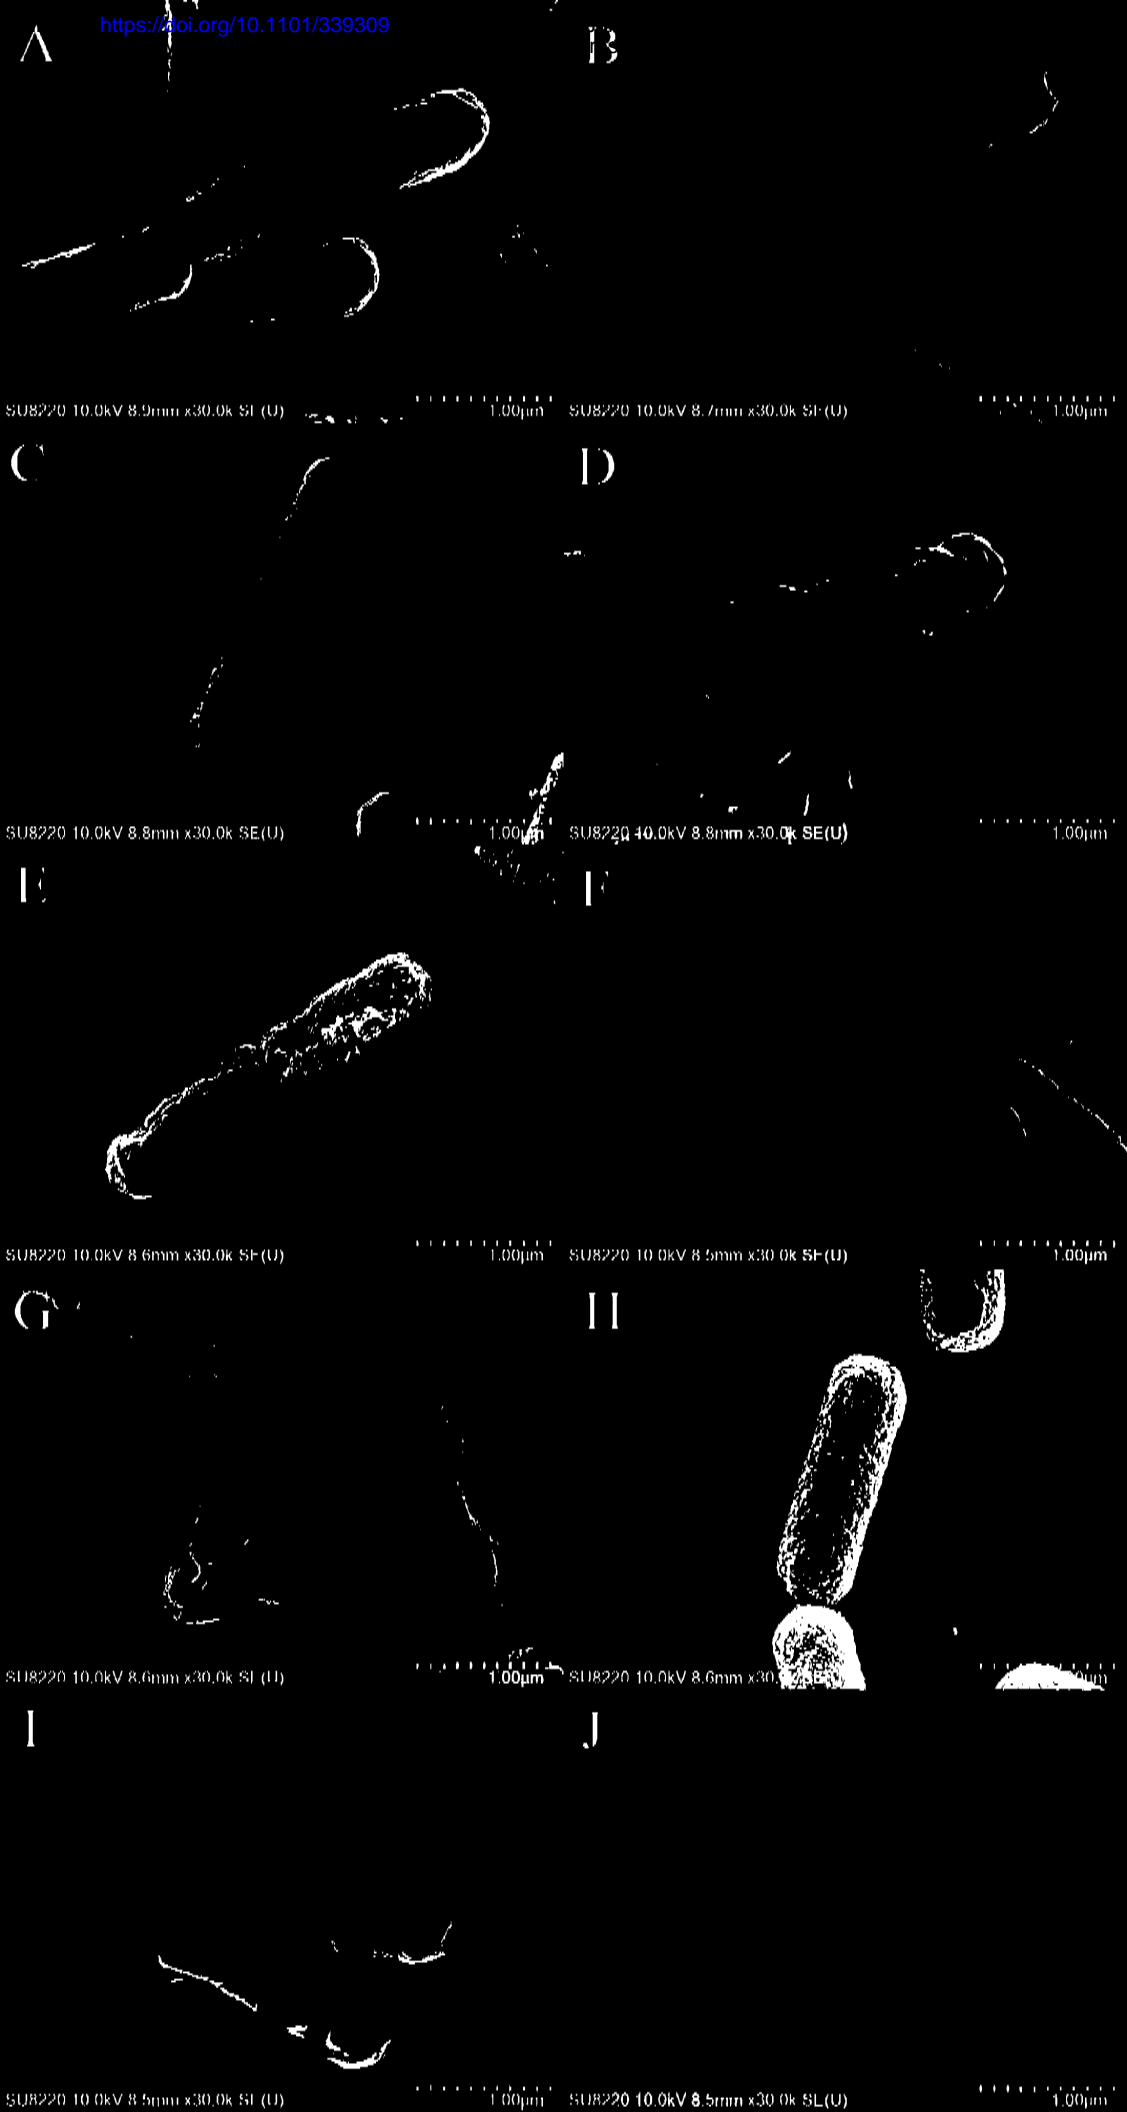

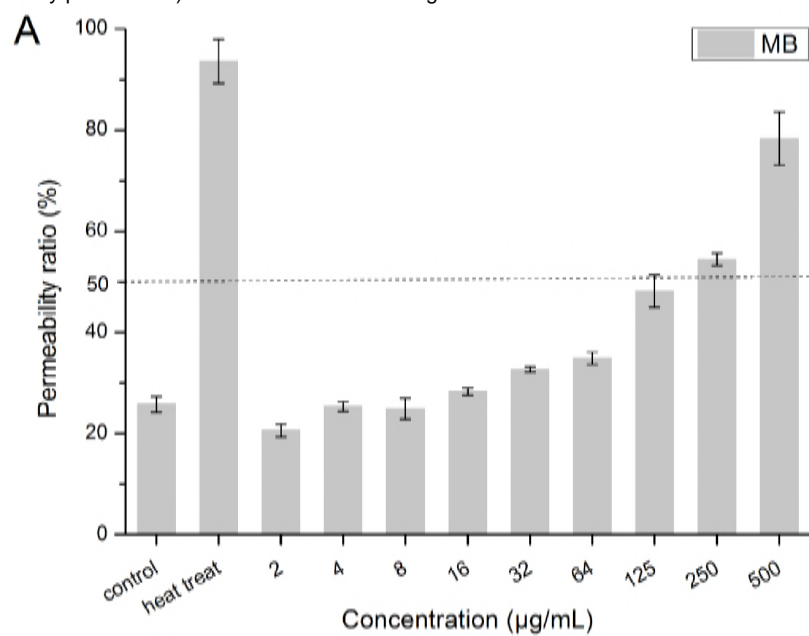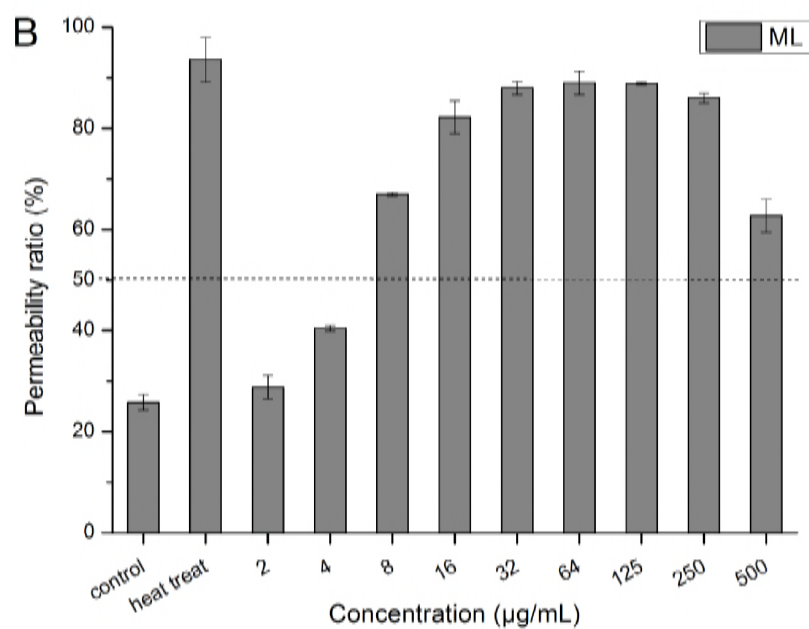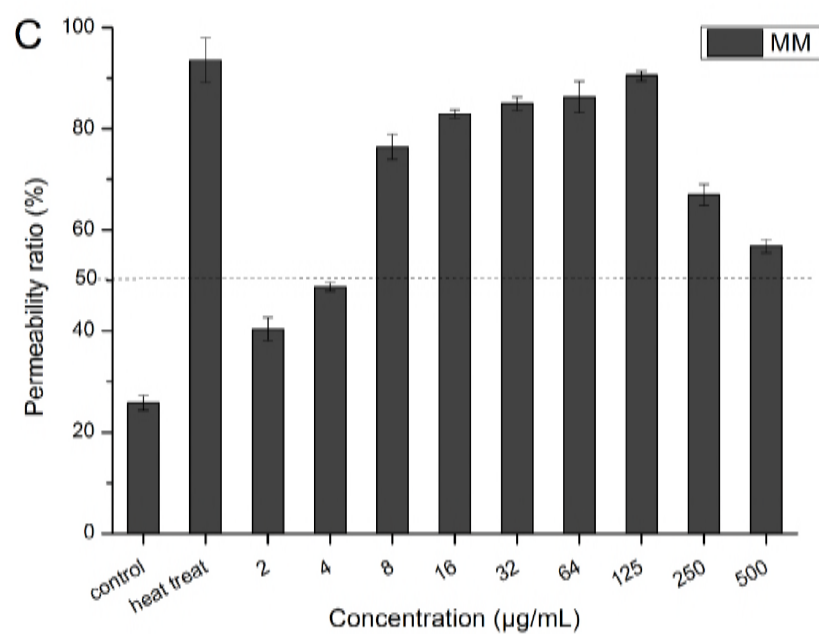

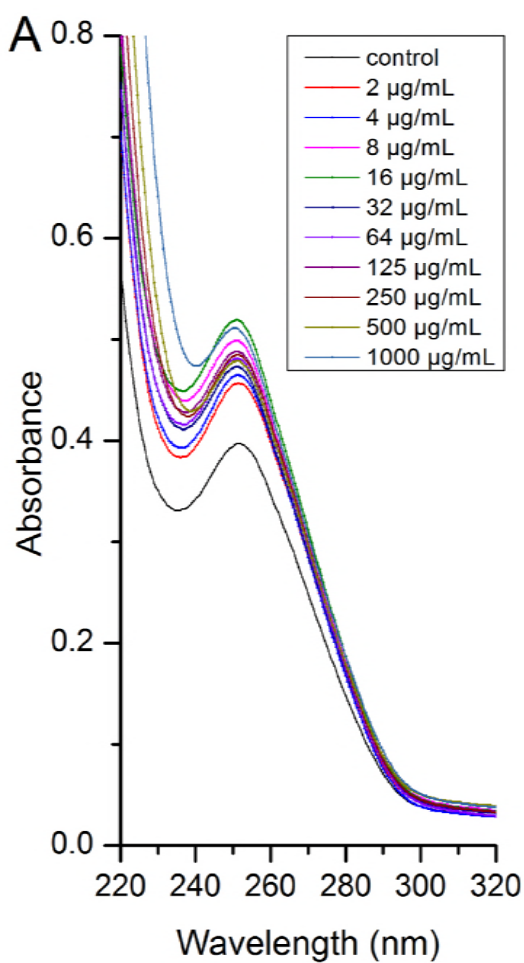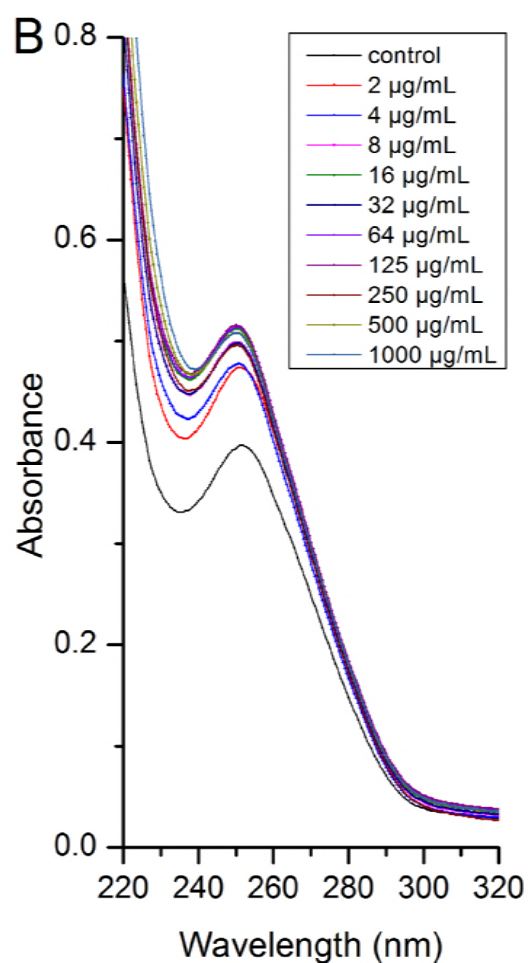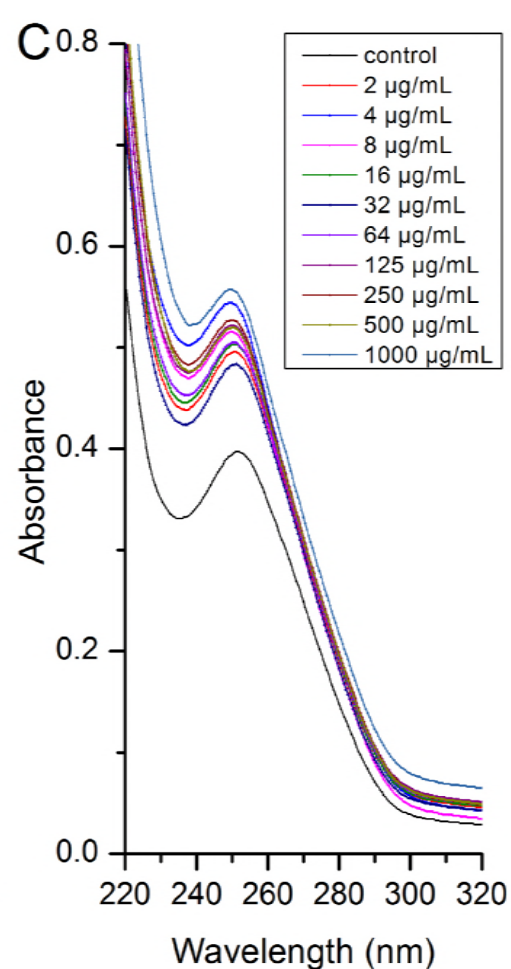

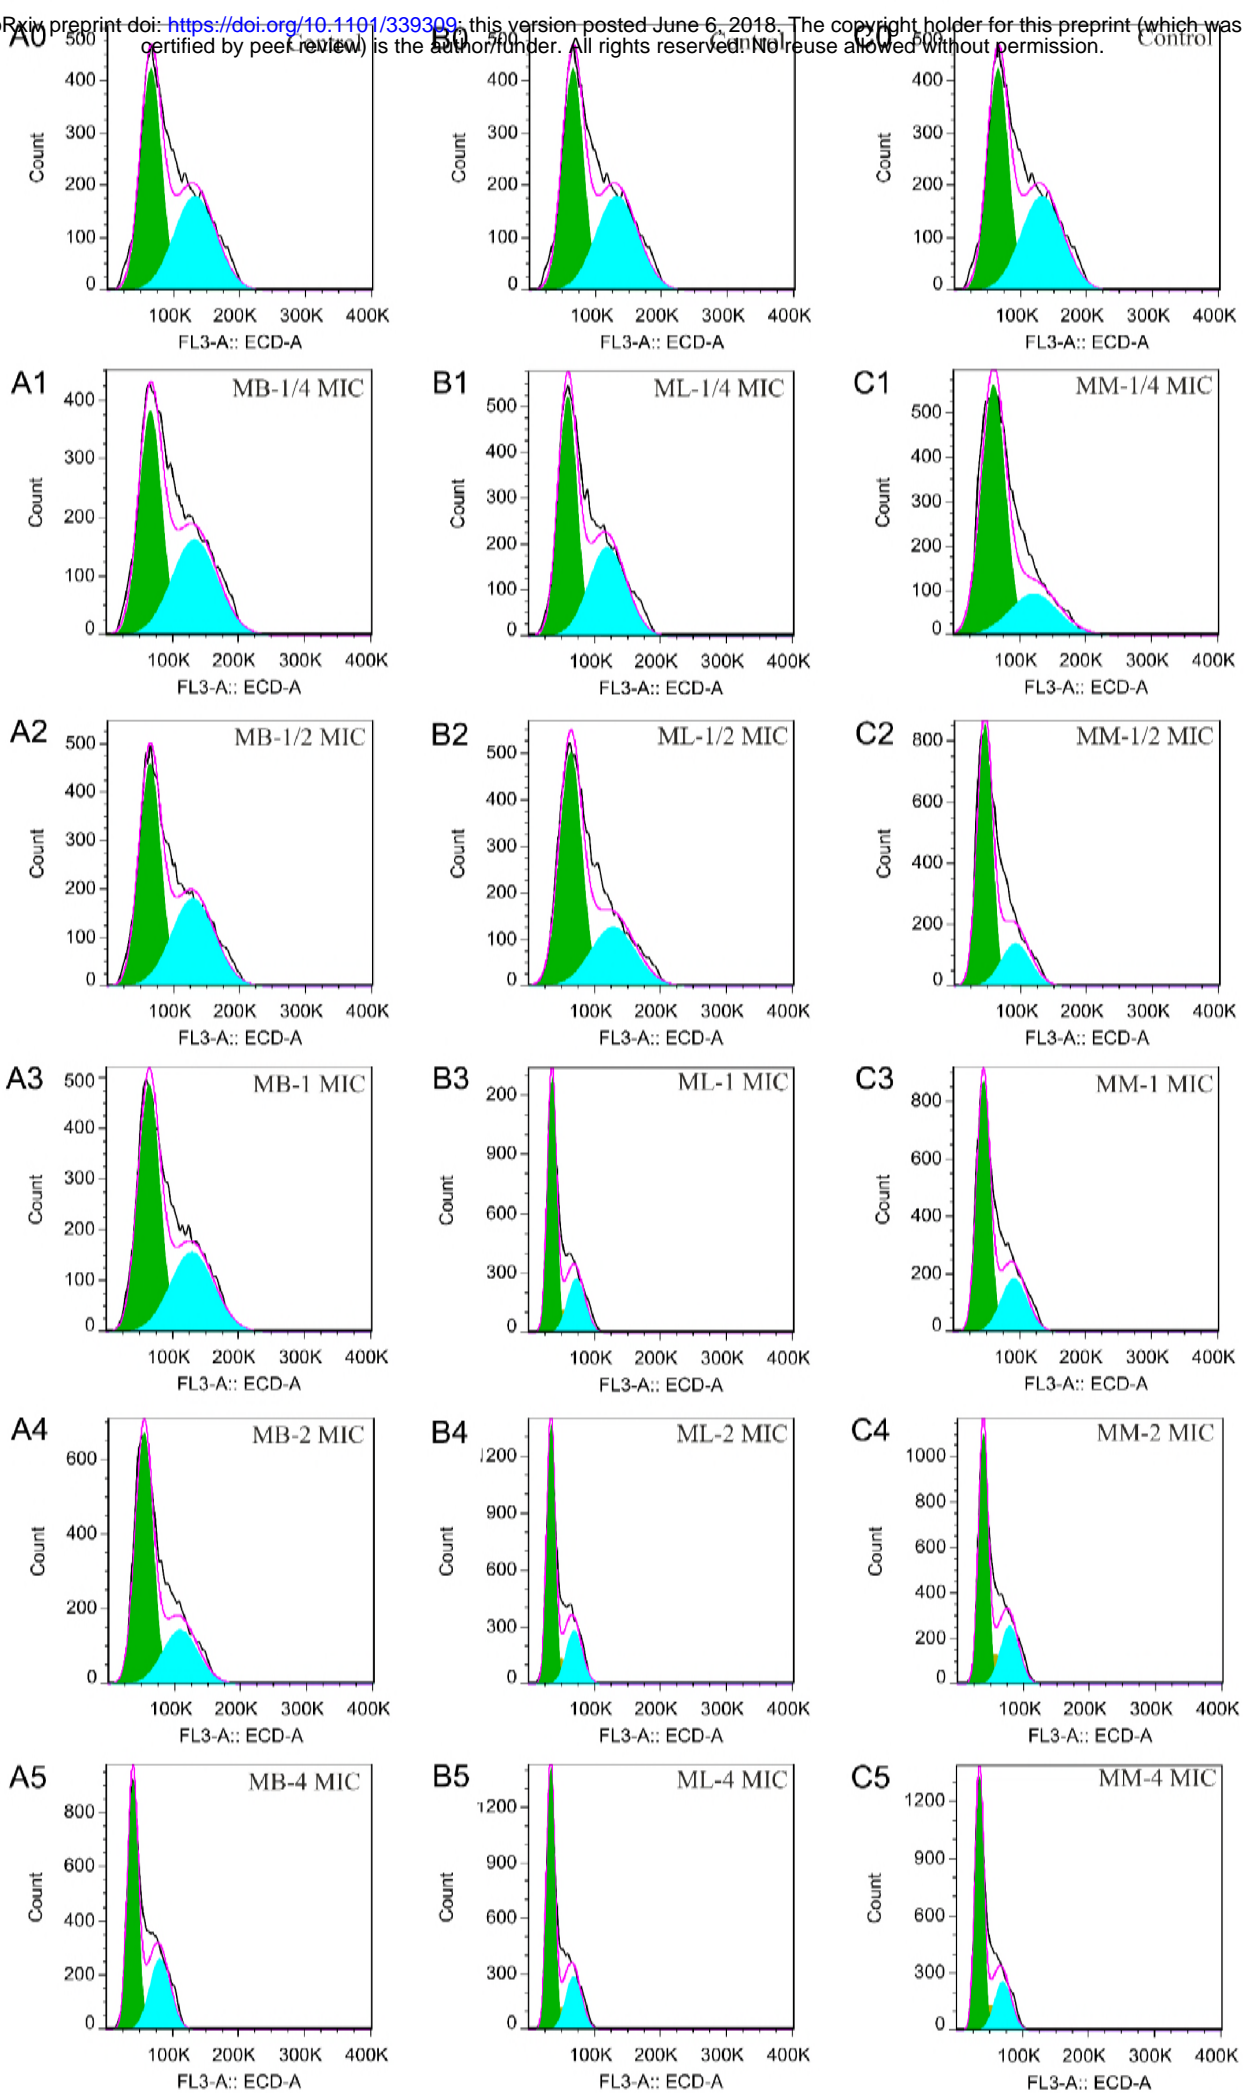

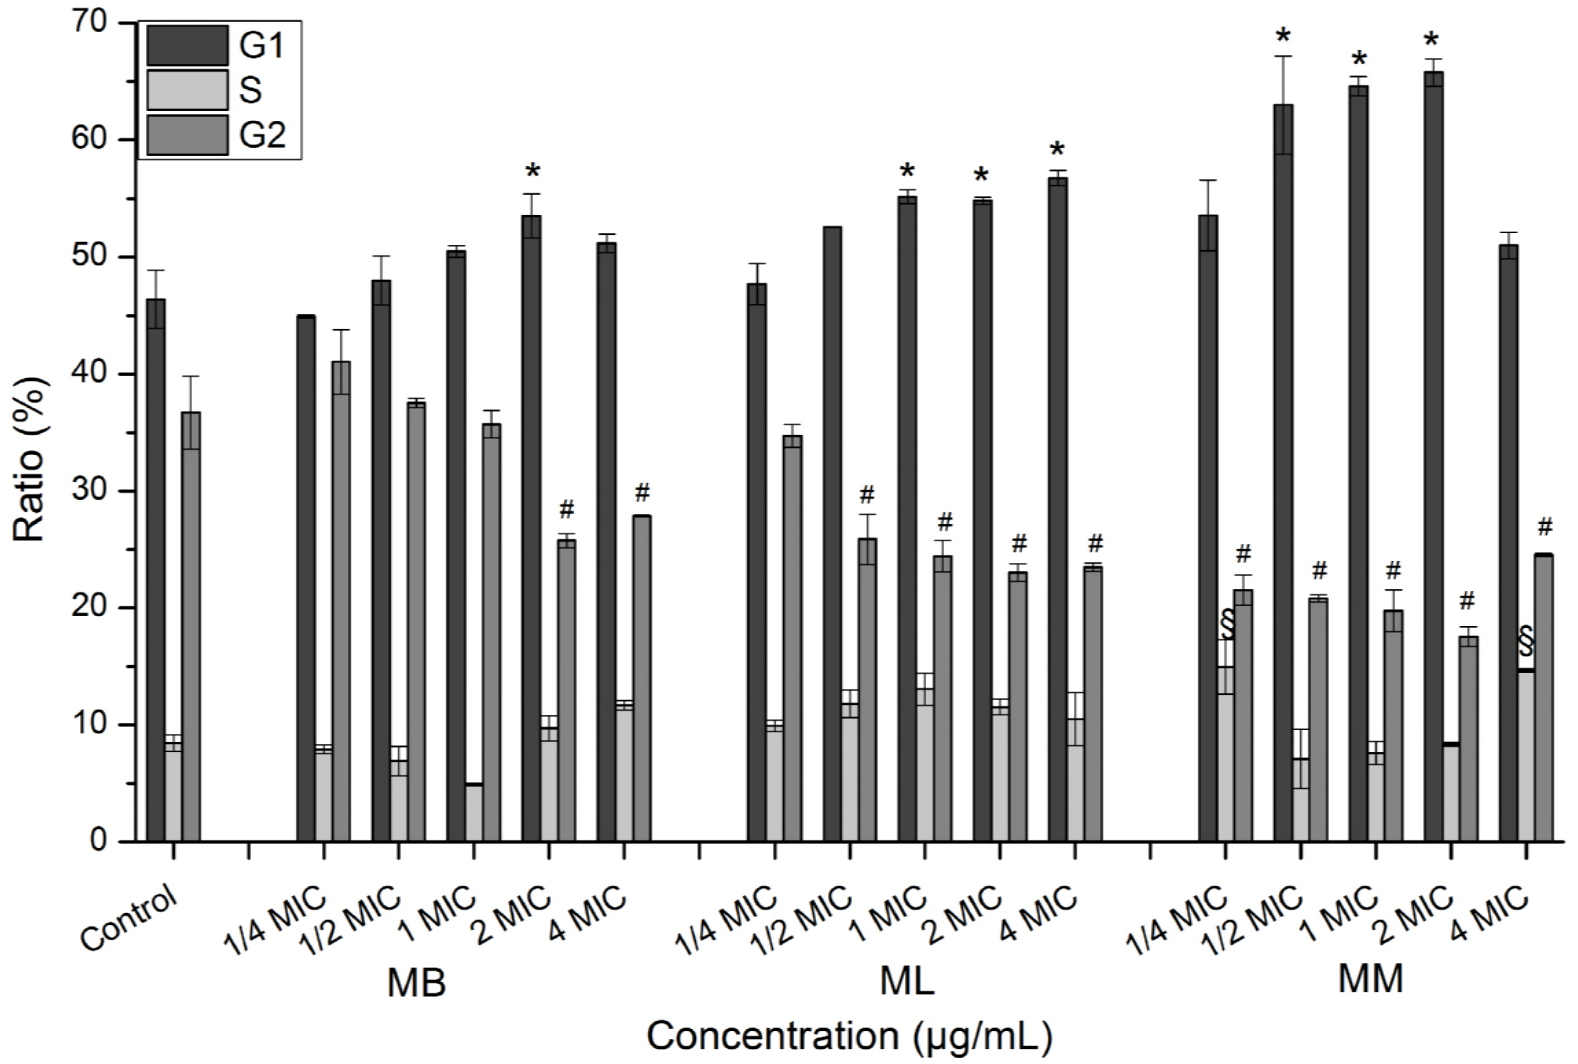

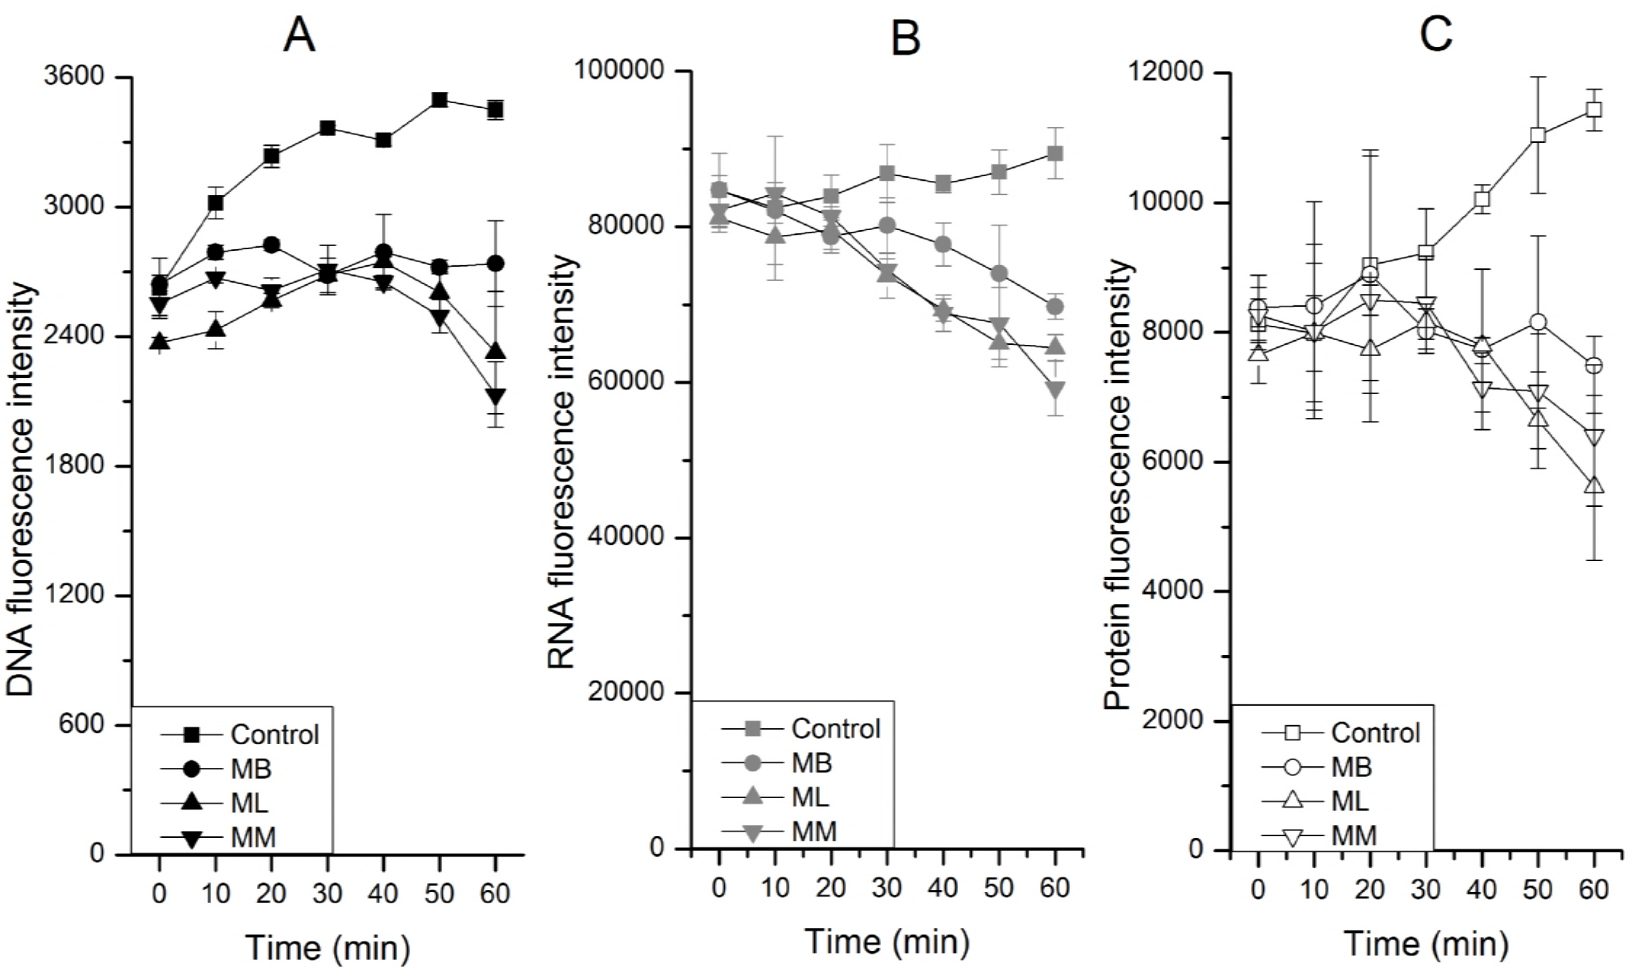



monolaurate

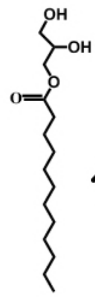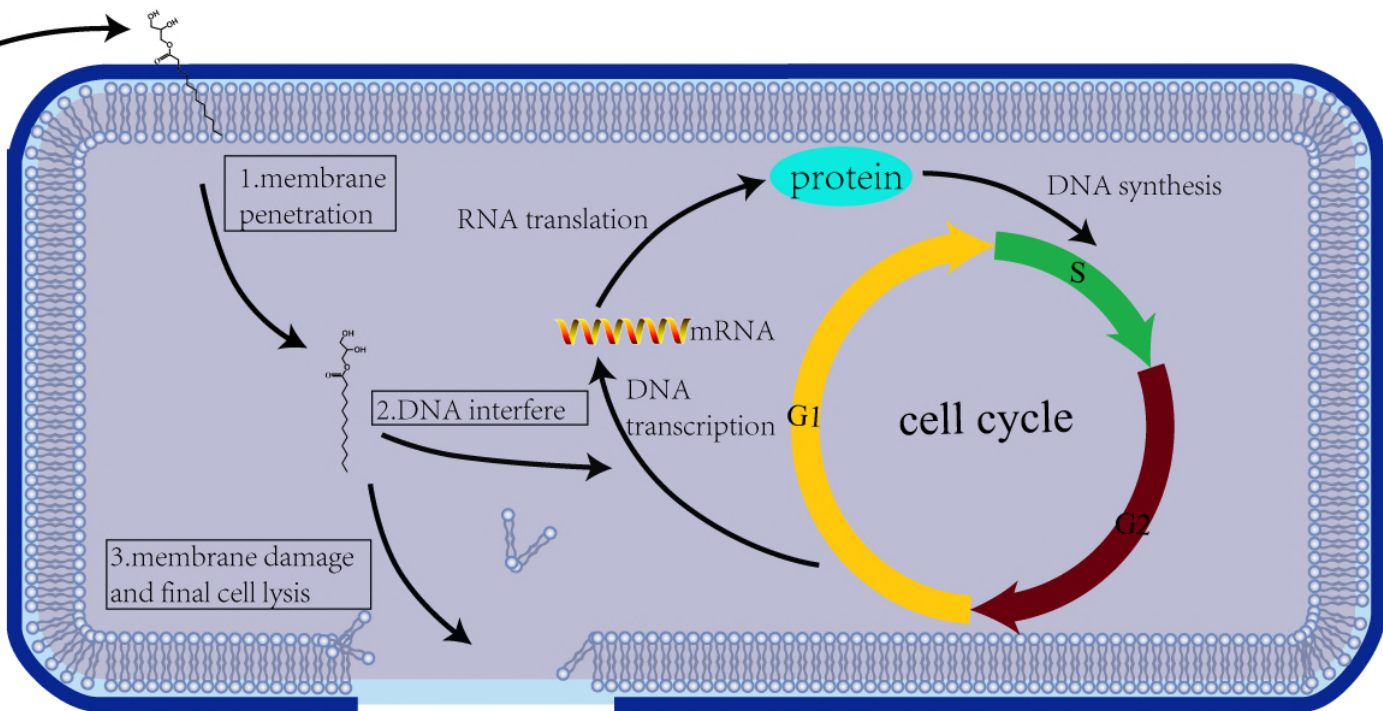

Source: https://www.biorxiv.org/content/10.1101/339309v1.full.pdf
